# Supplementary material for: Evolution of weedy giant ragweed (Ambrosia trifida): Multiple origins and gene expression variability facilitates weediness
Source: PubMed Central journal article supplement (PMC9731915; doi:10.1002/ece3.9590), 2022-12-08

## Reference transcriptome establishment

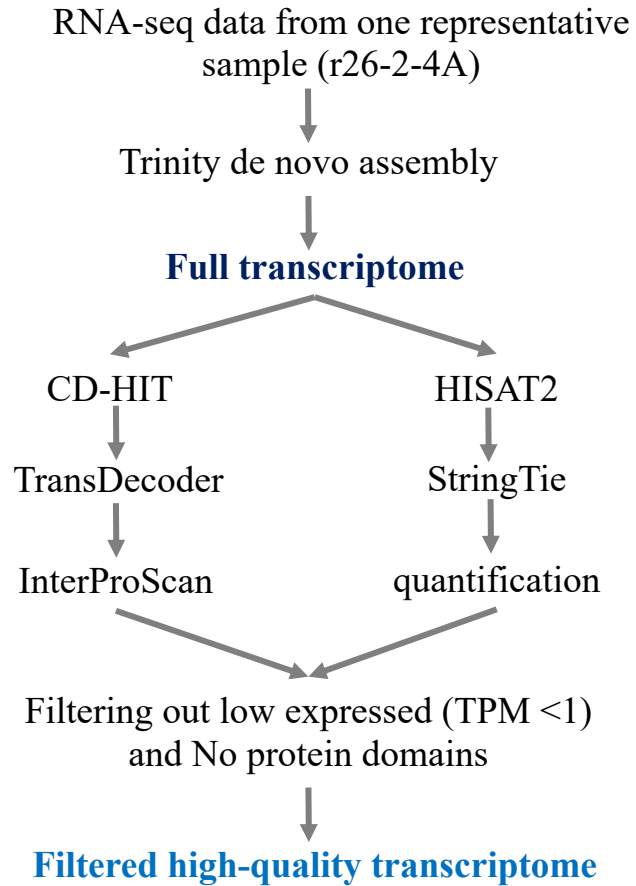

## SNP calling

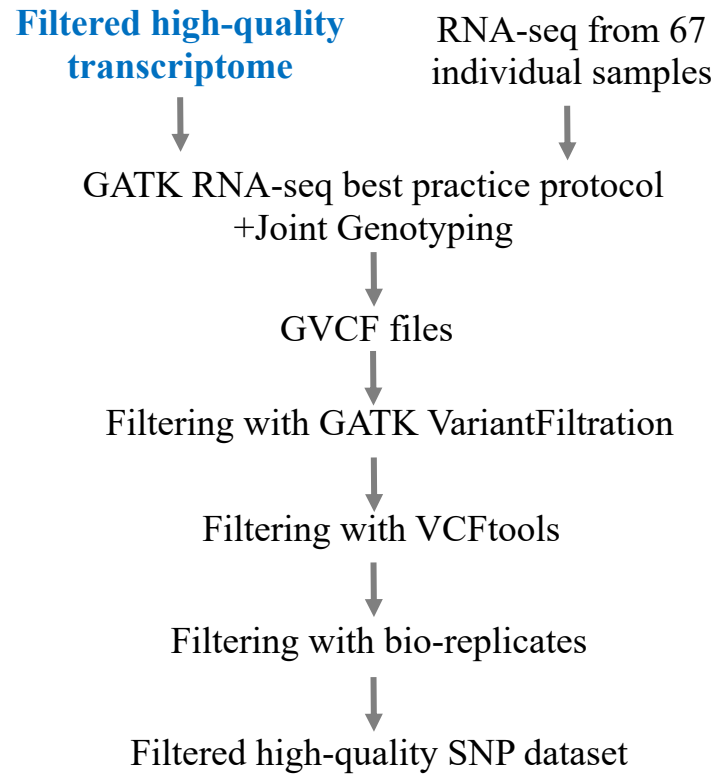

## Gene expression analysis

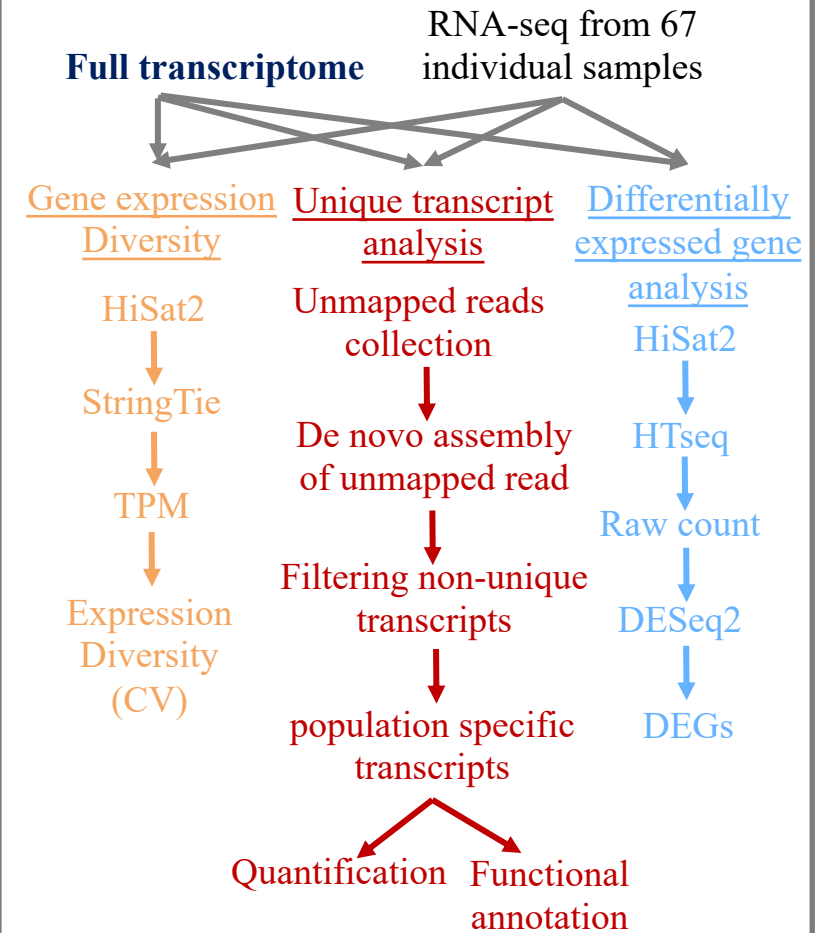

# BUSCO Assessment Results

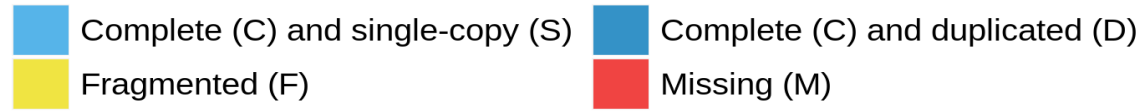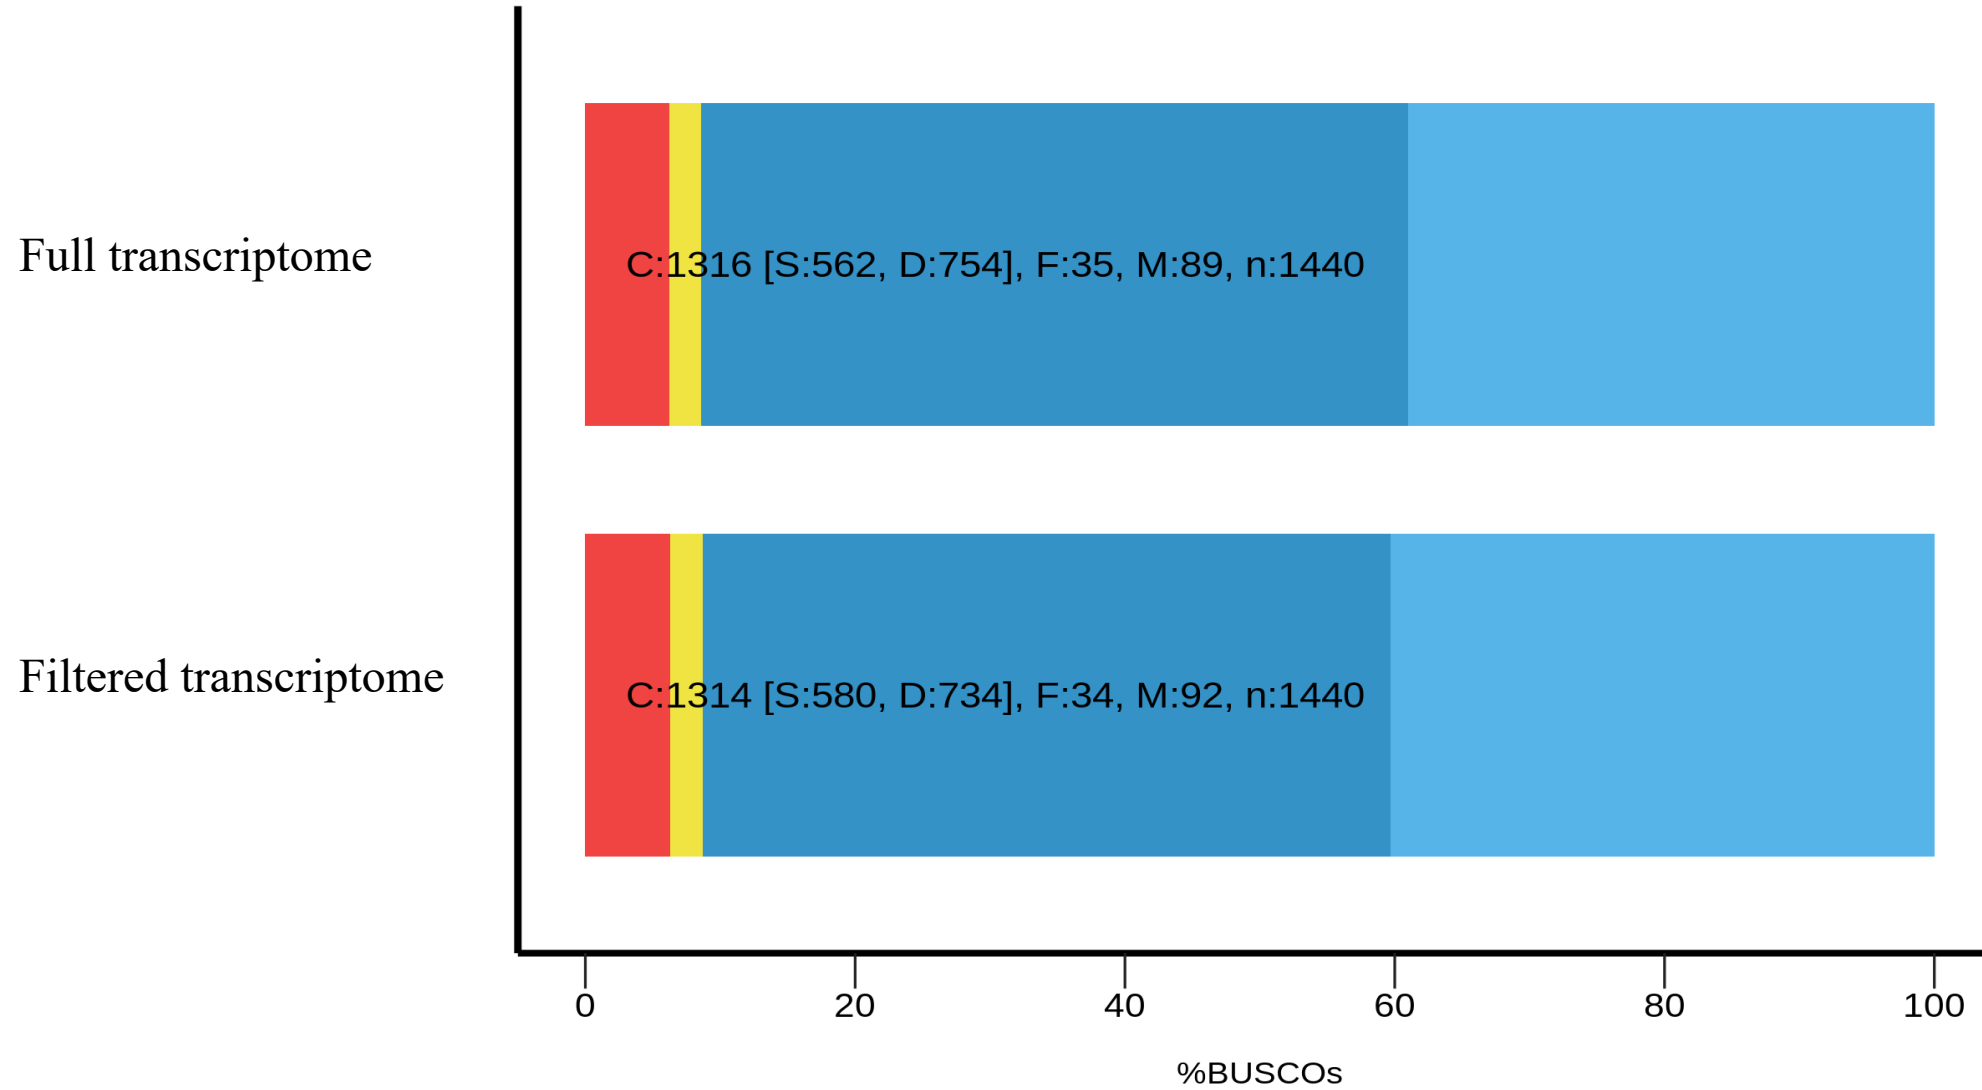

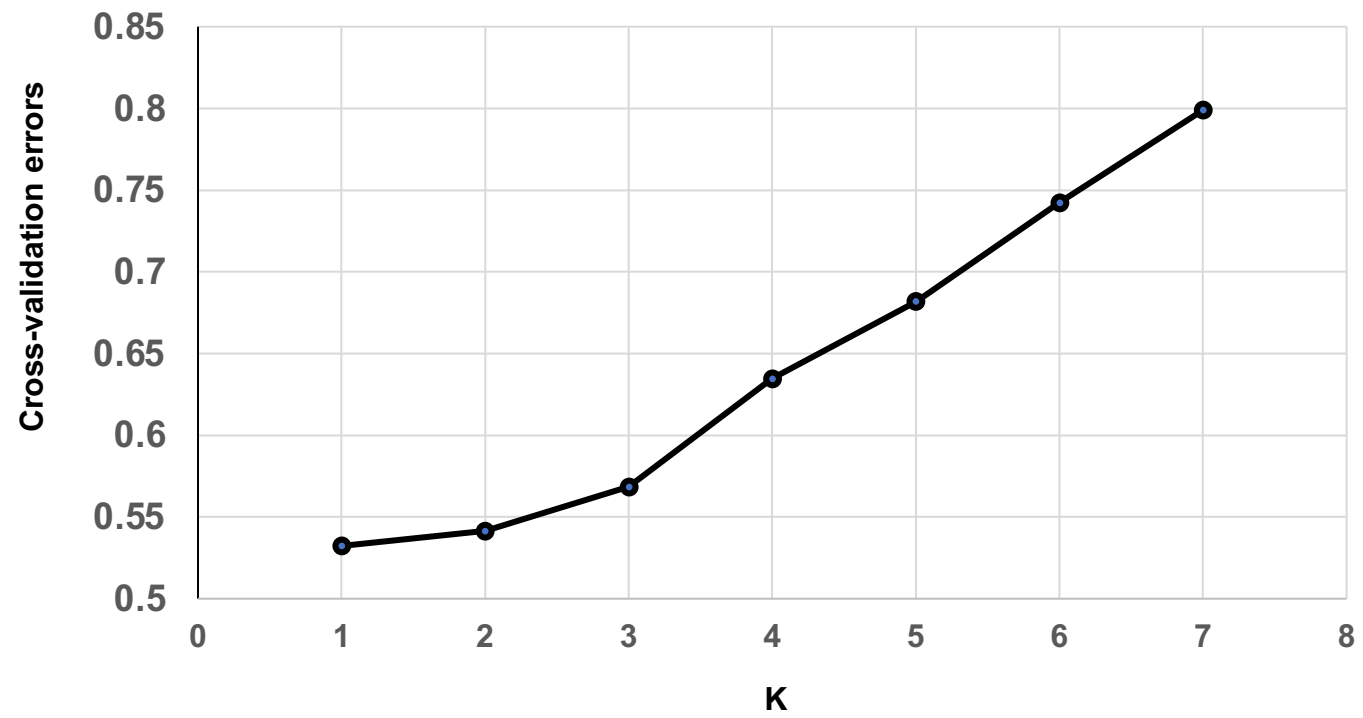

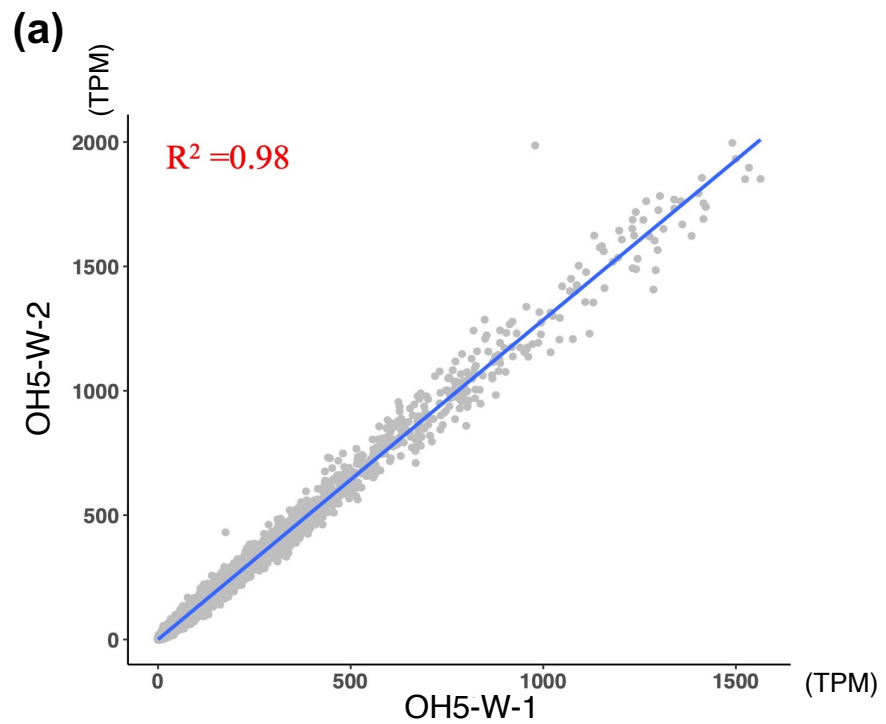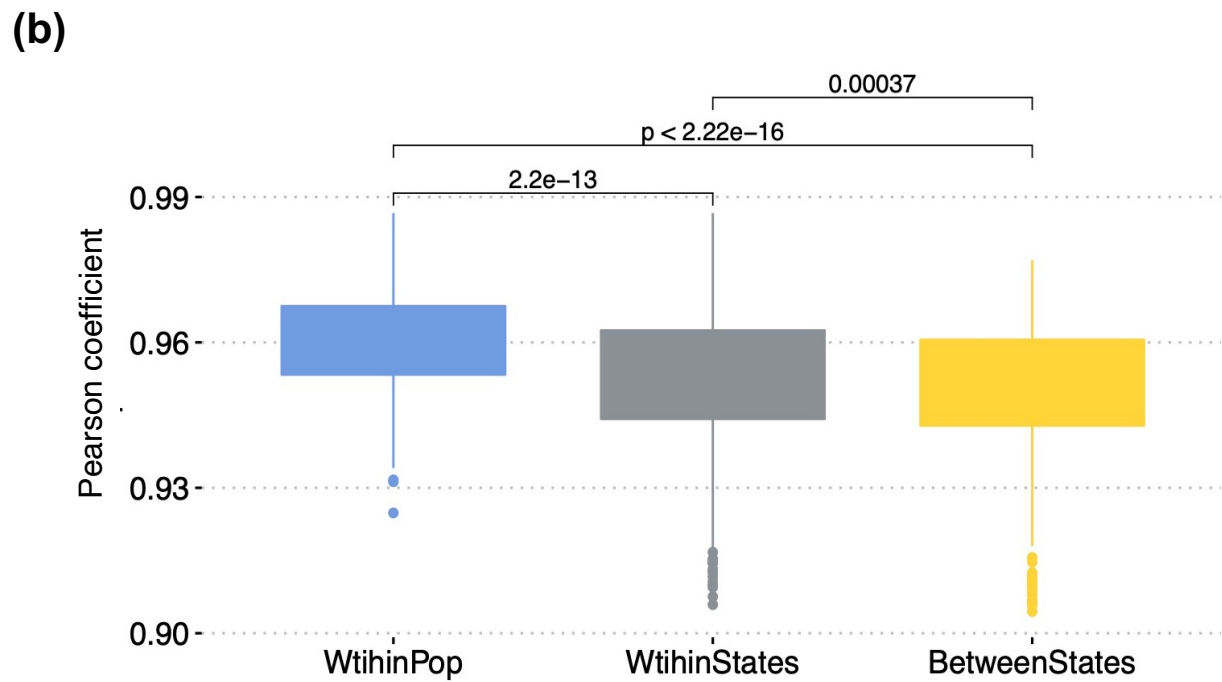

(c)

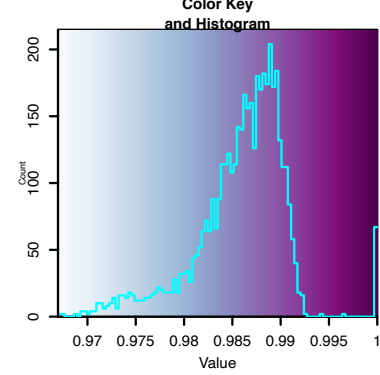

The Pearson correlation of each sample

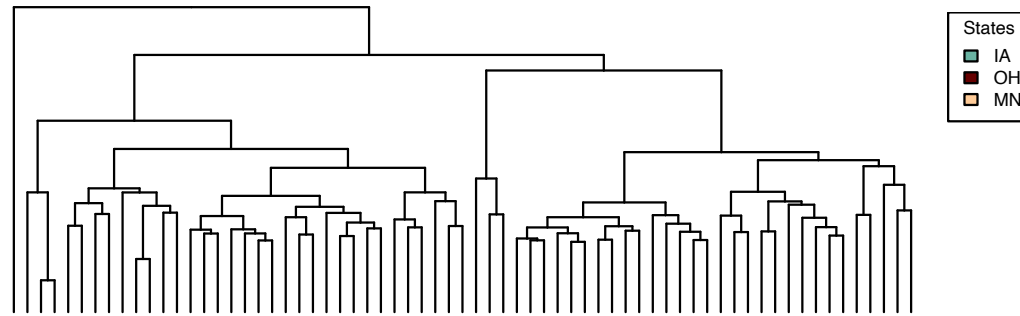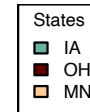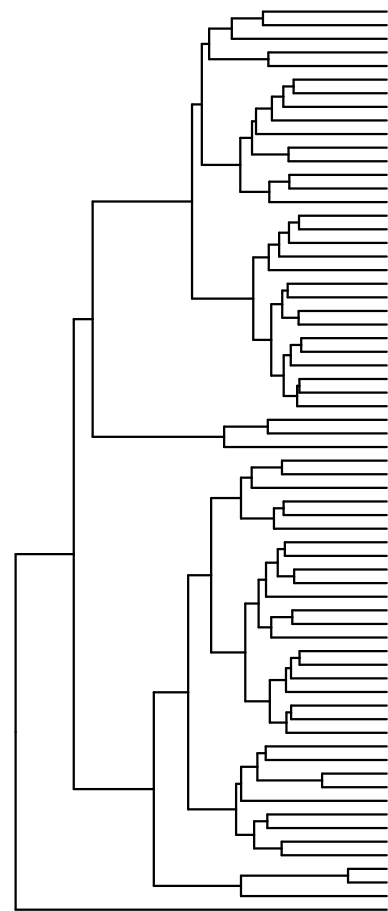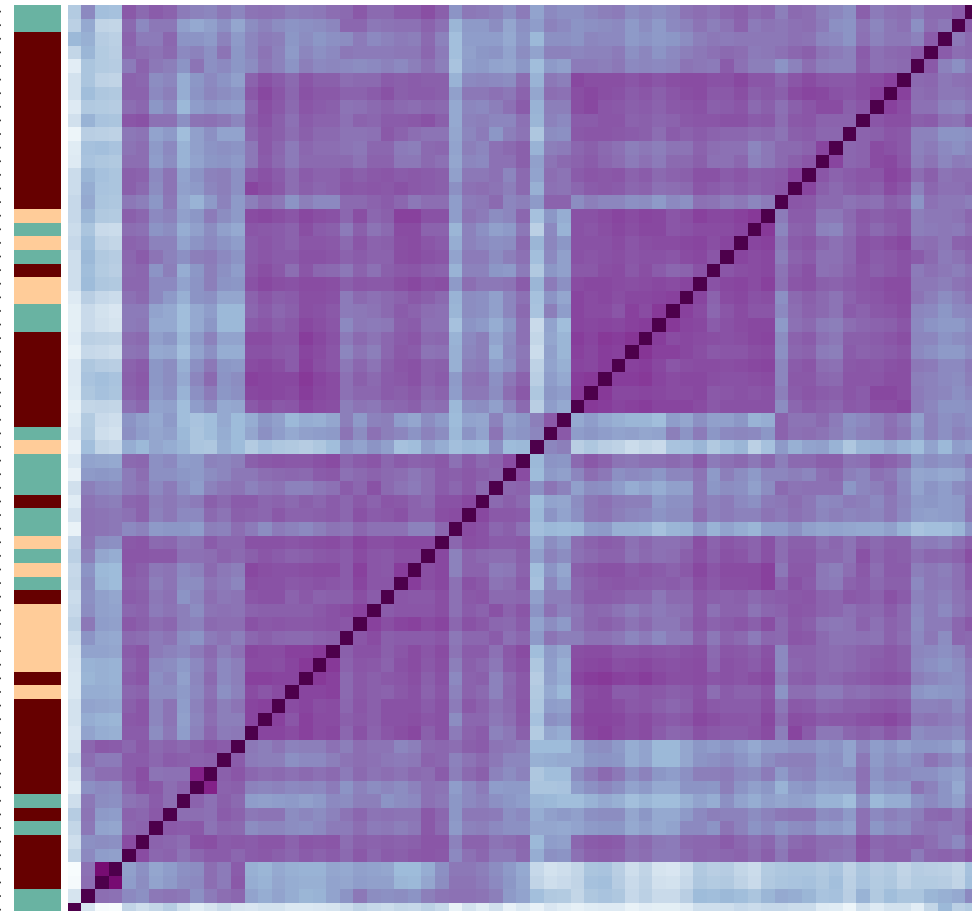

IA6-A-2 \*  
IA4-A-1 \*  
OH7-A-4 \*  
OH8-W-3  
OH8-W-1  
OH9-W-4  
OH3-W-5  
OH2-W-1  
OH7-A-1 \*  
OH6-W-3  
OH1-A-3 \*  
OH1-A-2 \*  
OH2-W-2  
OH3-W-2  
OH9-W-2  
MN2-W-3  
IA1-A-4 \*  
MN2-W-4  
IA7-W-1  
OH1-A-1 \*  
MN2-W-1  
MN3-A-1 \*  
IA3-W-3  
IA3-W-1  
OH10-A-3 \*  
OH10-A-2 \*  
OH2-W-3  
OH2-W-4  
OH3-W-4  
OH9-W-3  
OH9-W-1  
IA1-A-1 \*  
MN2-W-2  
IA3-W-2  
IA2-W-2  
IA1-A-3  
OH10-A-1 \*  
IA1-A-2 \*  
IA2-W-1 \*  
MN1-W-4  
IA4-A-2 \*  
MN3-A-3 \*  
IA3-W-4  
OH6-W-2  
MN1-W-2  
MN1-W-1  
MN2-W-5  
MN1-W-3  
MN3-A-2 \*  
OH10-A-4 \*  
MN3-A-4 \*  
OH6-W-1  
OH3-W-3  
OH3-W-1  
OH4-A-1 \*  
OH7-A-2 \*  
OH4-A-4 \*  
OH4-A-3 \*  
IA7-W-2  
OH4-A-2 \*  
IA5-W-1  
OH8-W-2  
OH7-A-3 \*  
OH5-W-2  
OH5-W-1  
IA5-W-2  
IA6-A-1 \*

Supplemental Figure S4

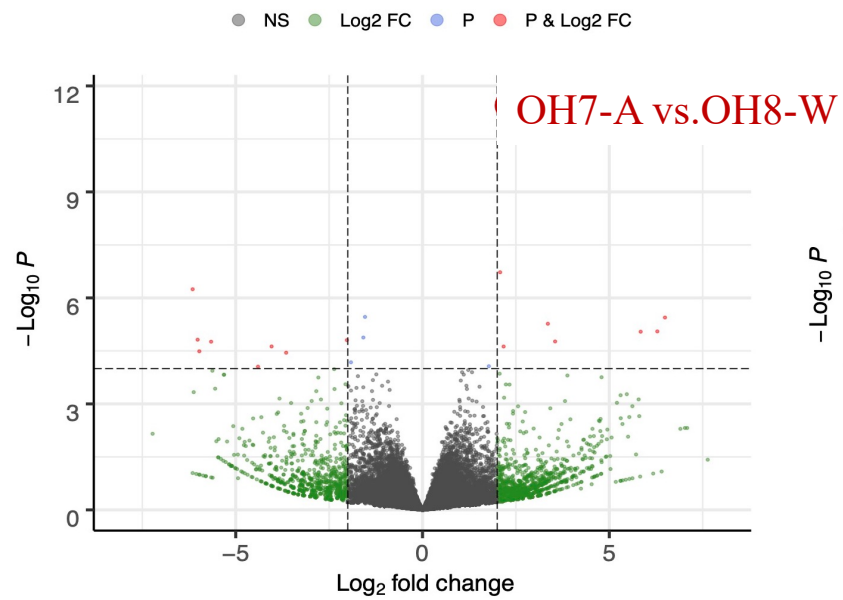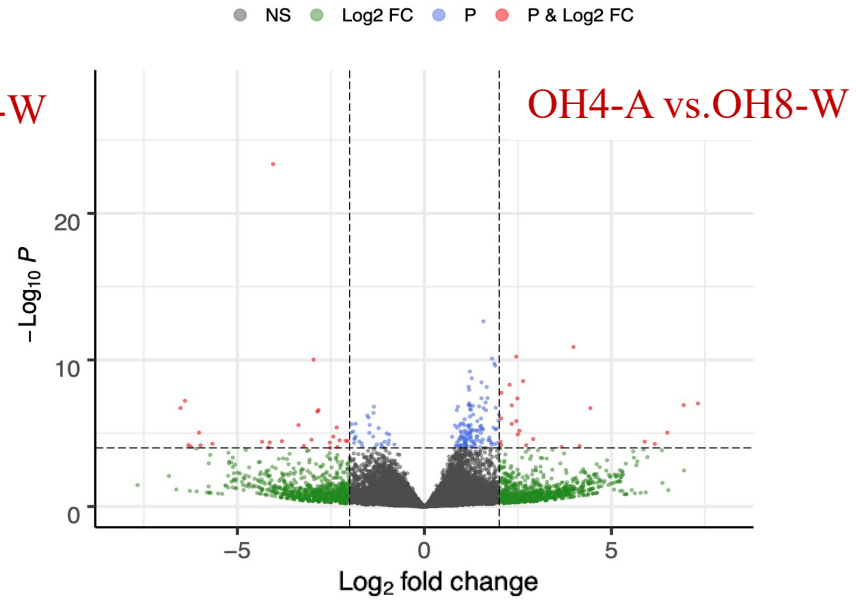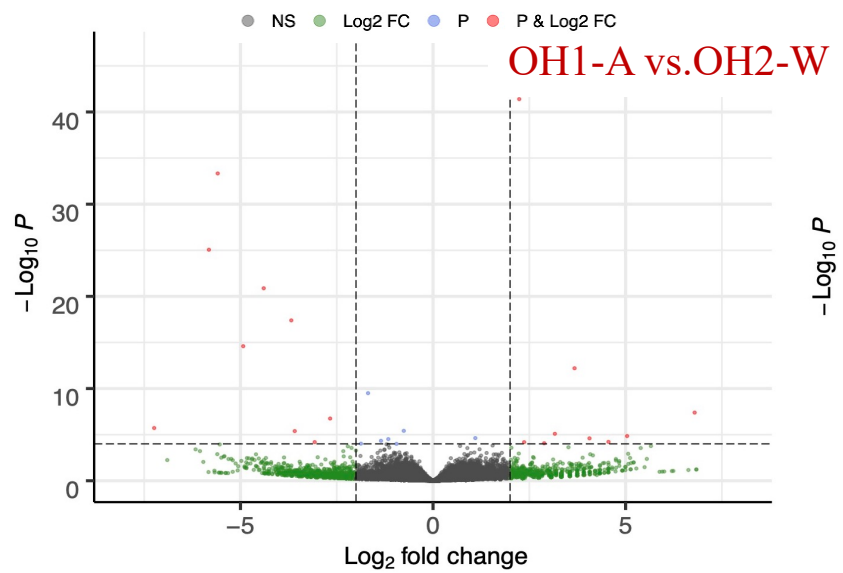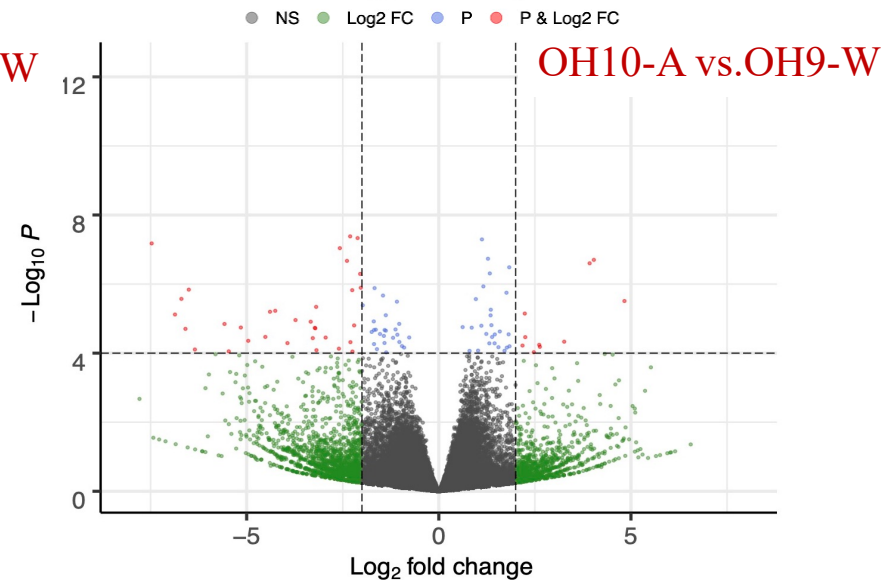

● NS ● Log2 FC ● P ● P & Log2 FC

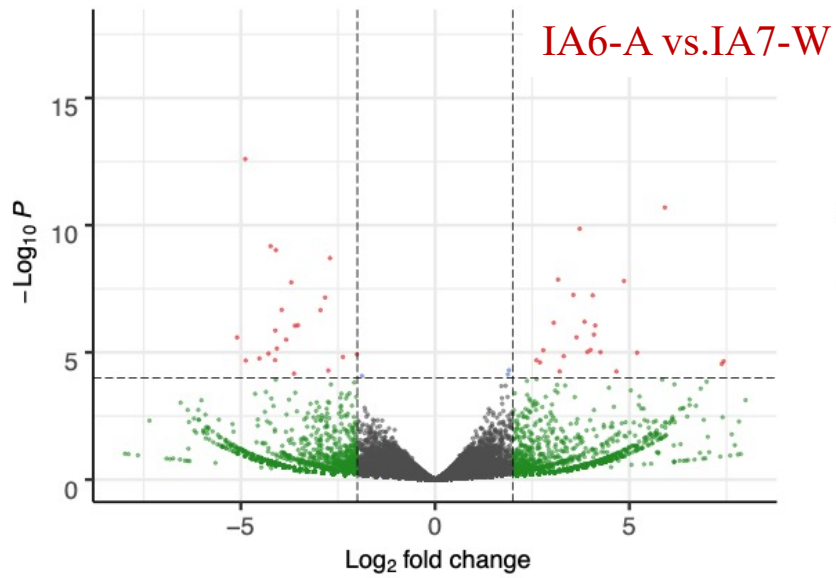

● NS ● Log2 FC ● P ● P & Log2 FC

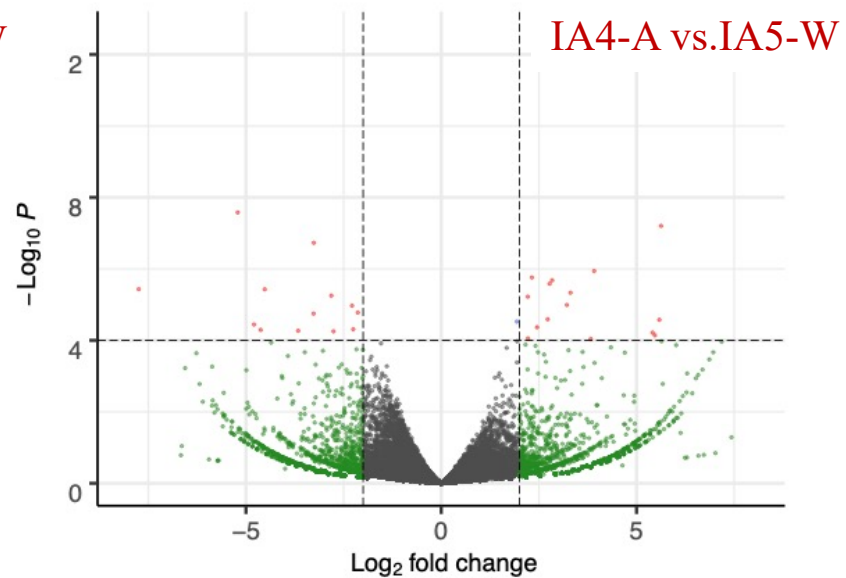

● NS ● Log2 FC ● P ● P & Log2 FC

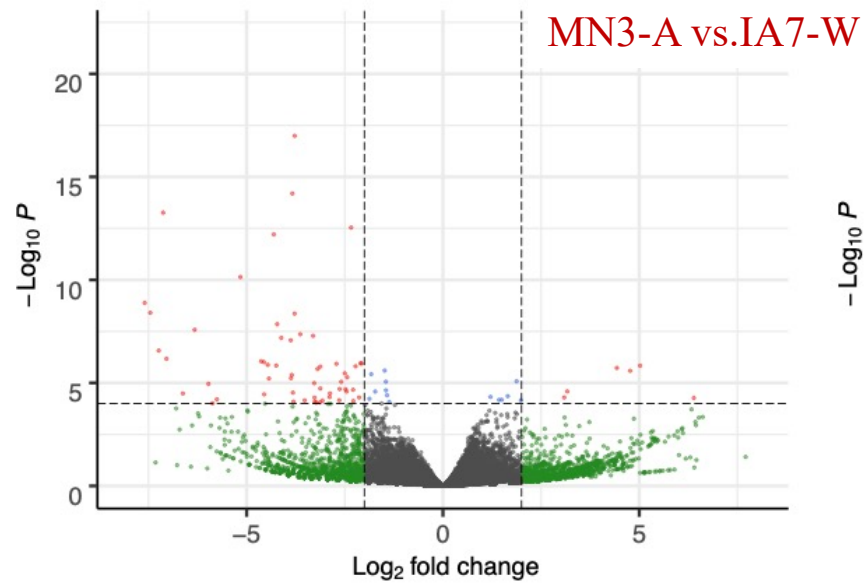

● NS ● Log2 FC ● P ● P & Log2 FC

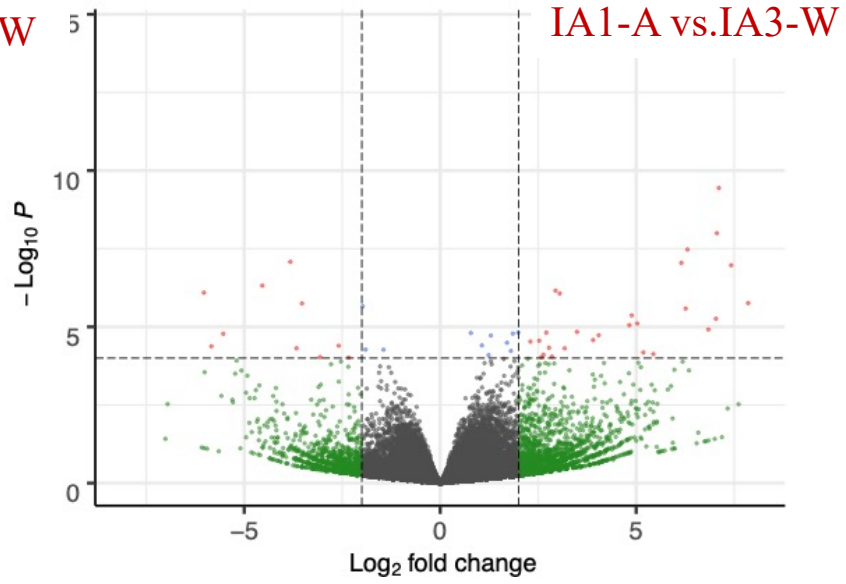

## OH4-A upregulated genes

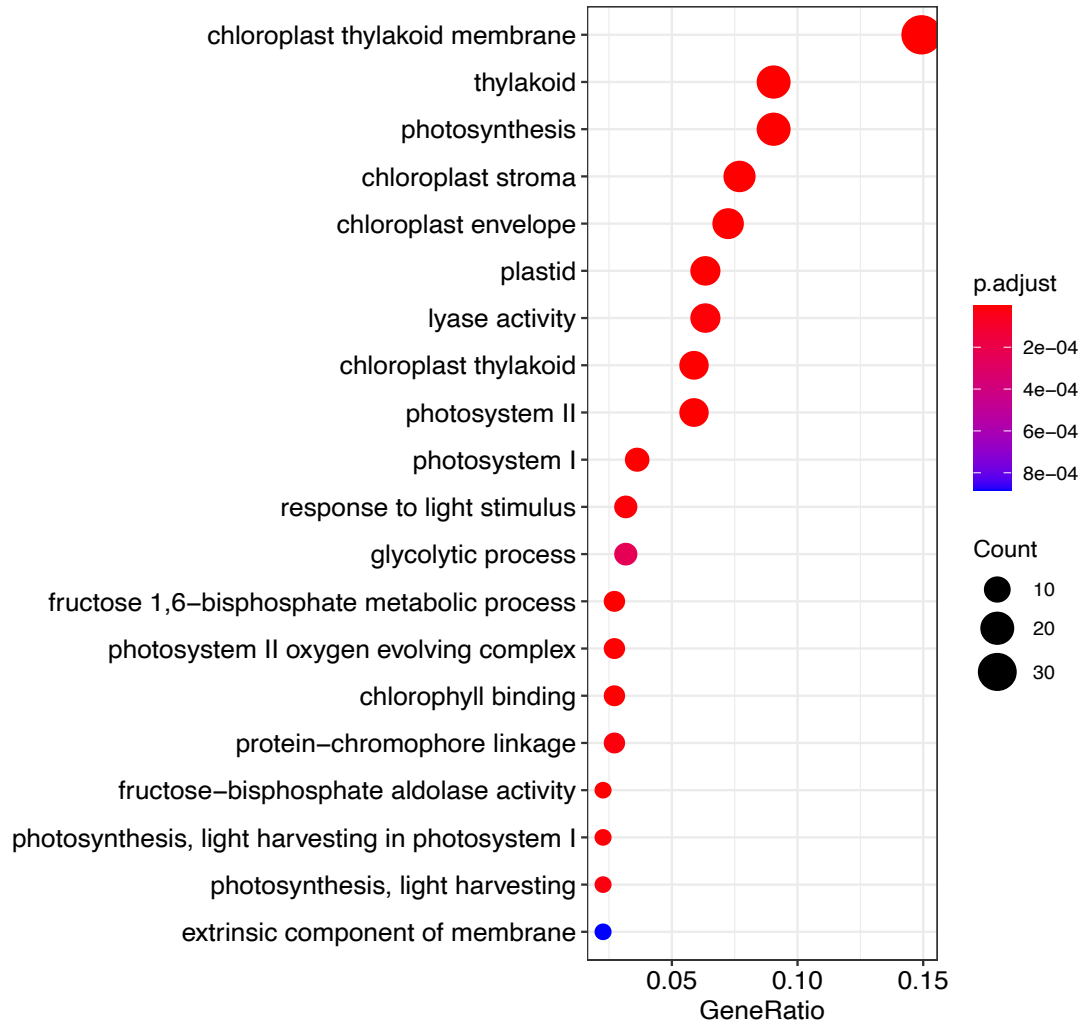

## OH10-A upregulated genes

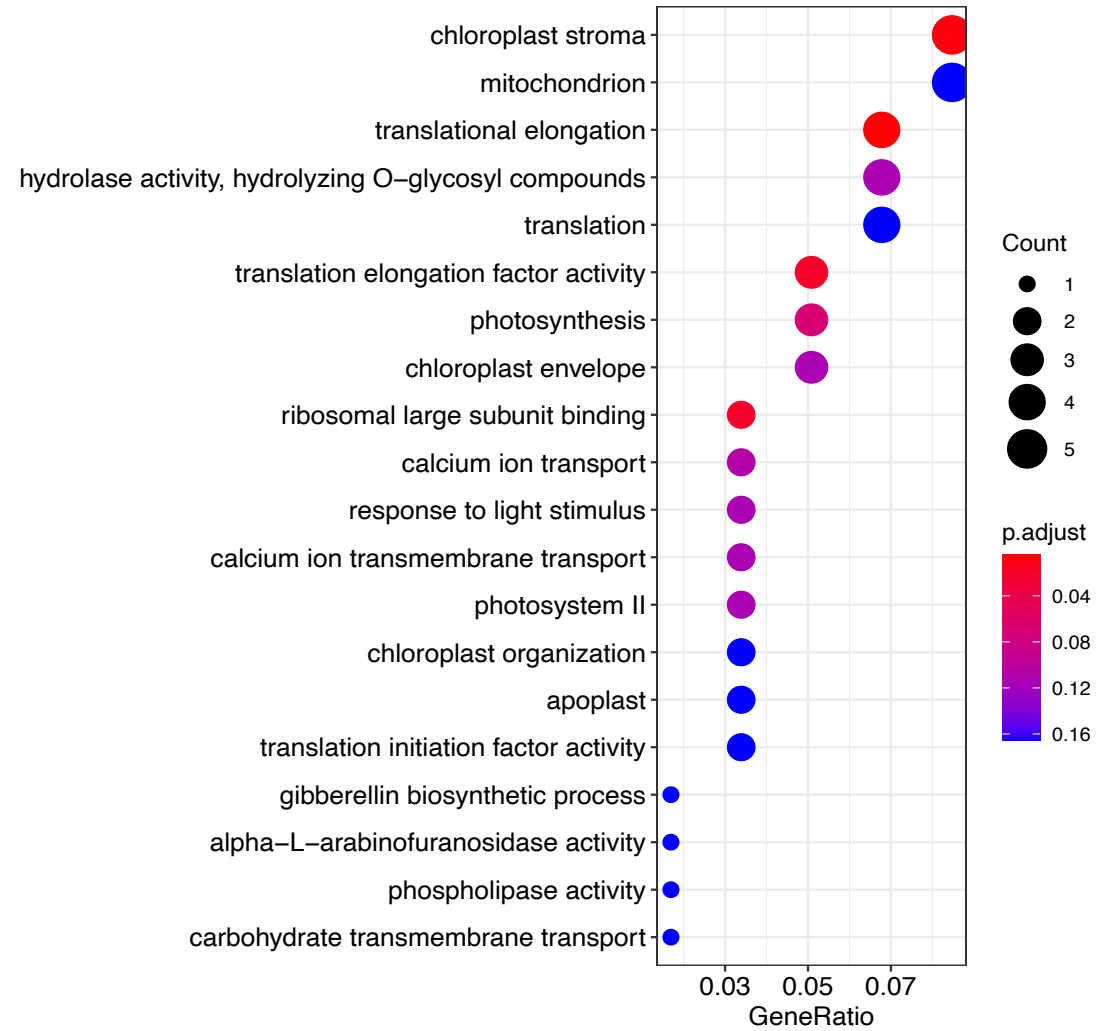



## IA4-A upregulated genes

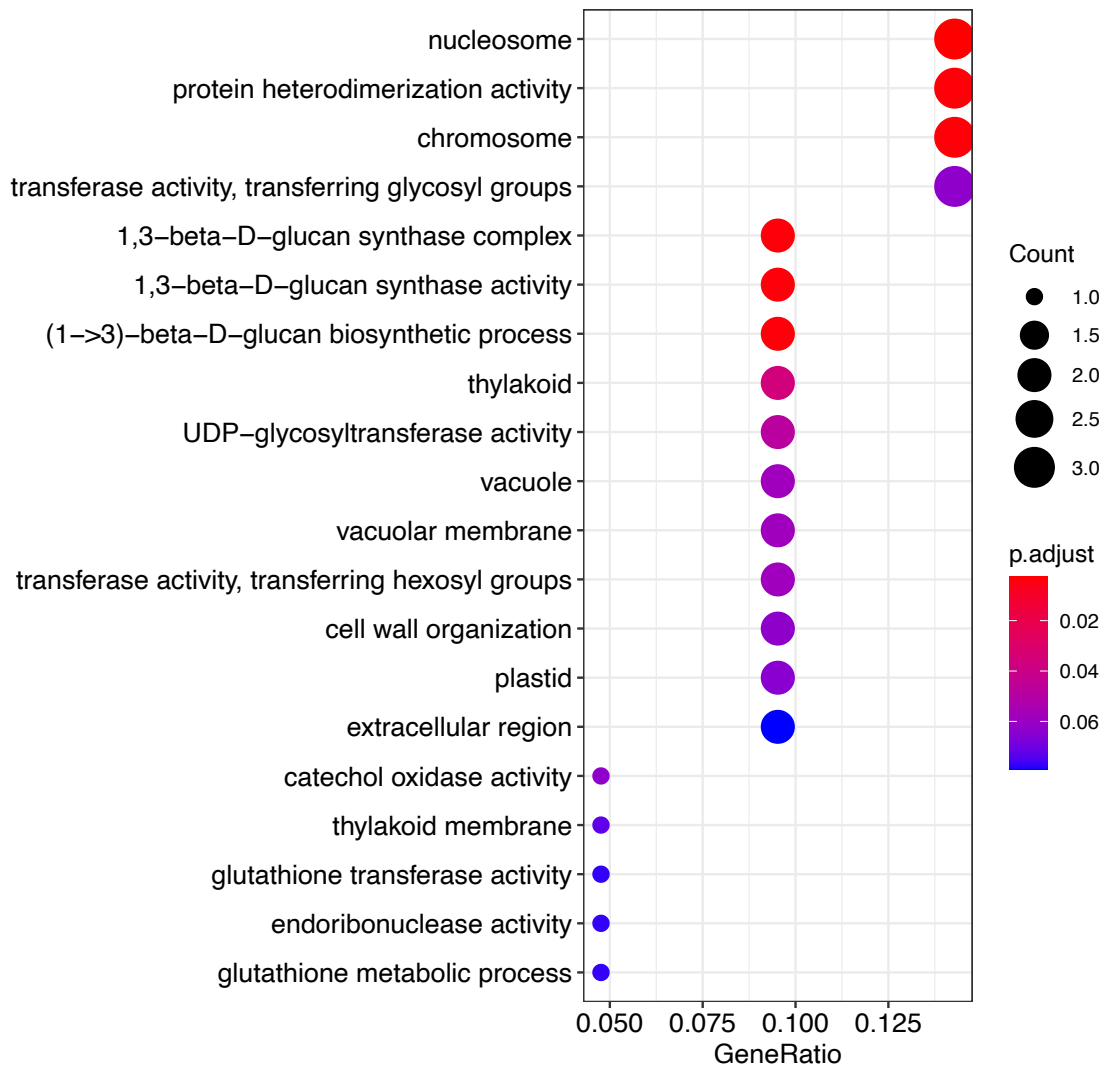

## IA6-A upregulated genes

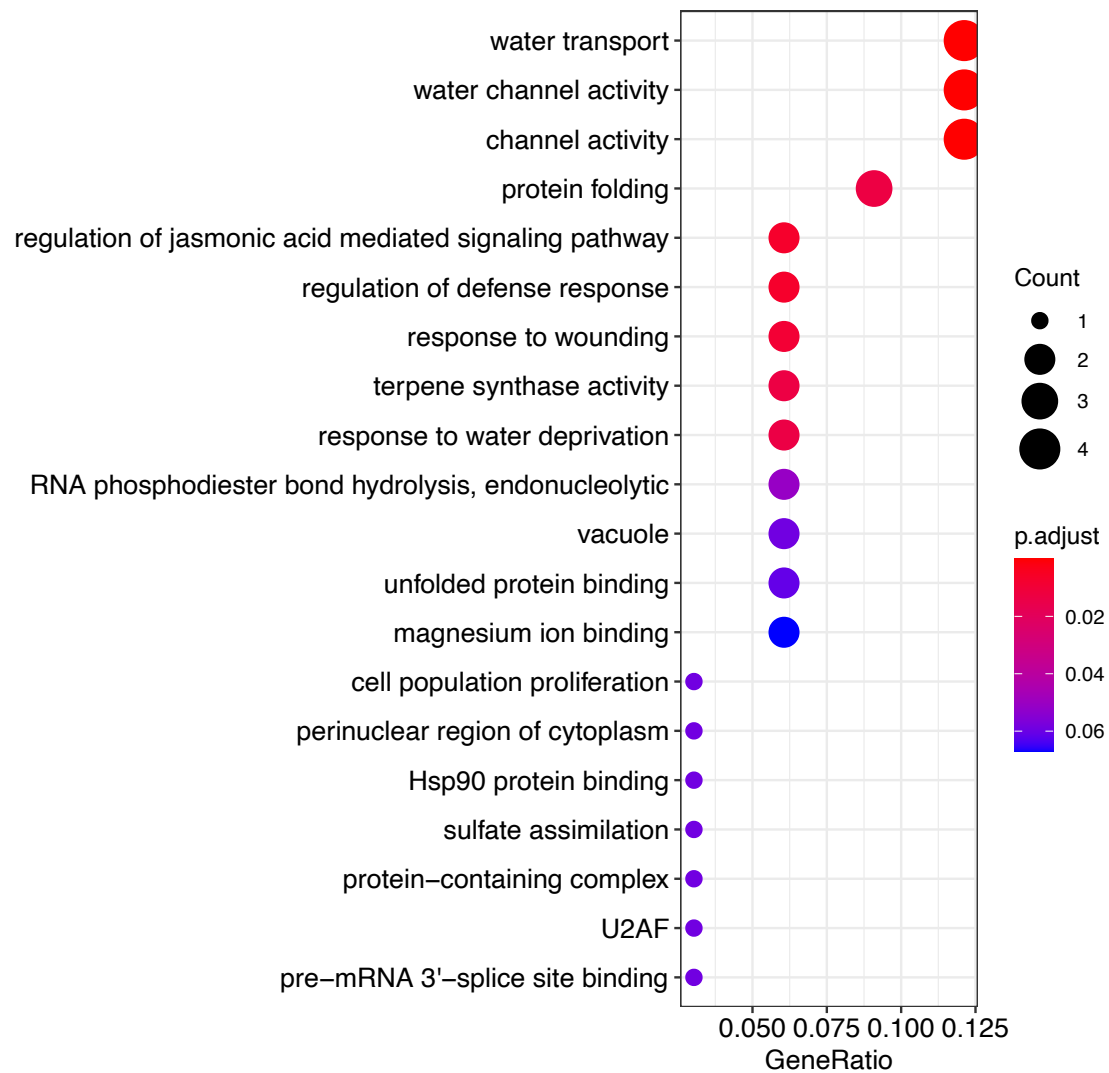

(a)

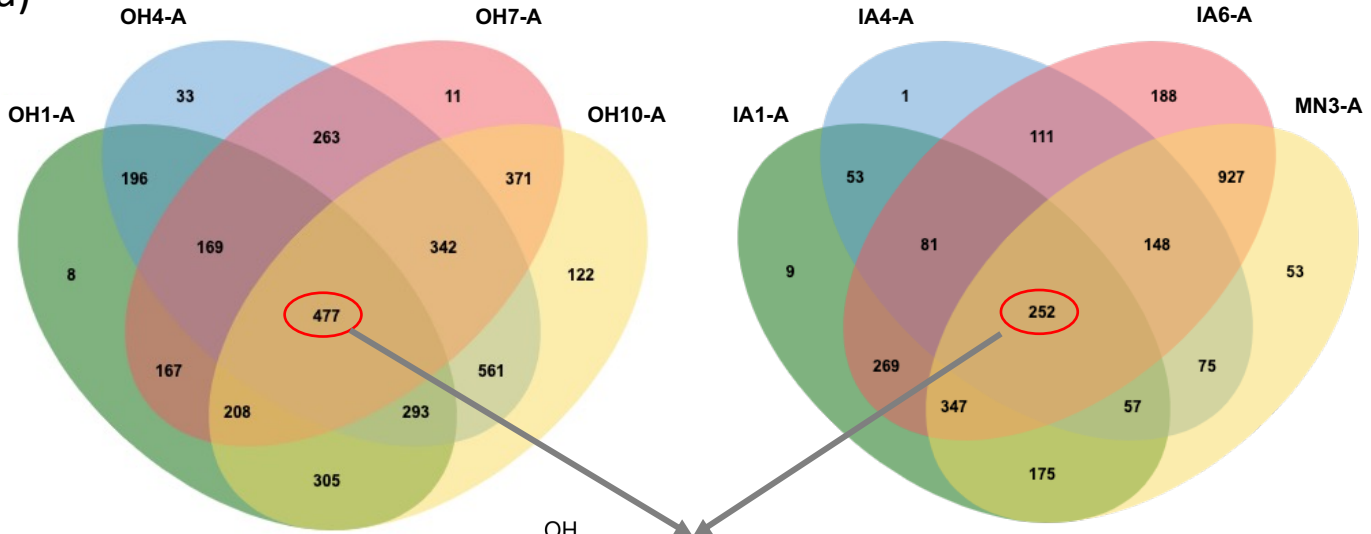

(b)

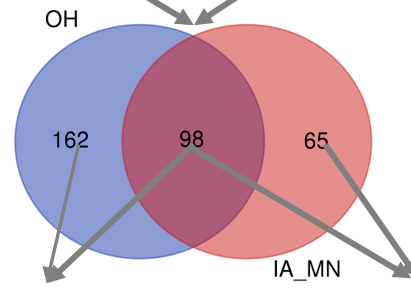

(c)

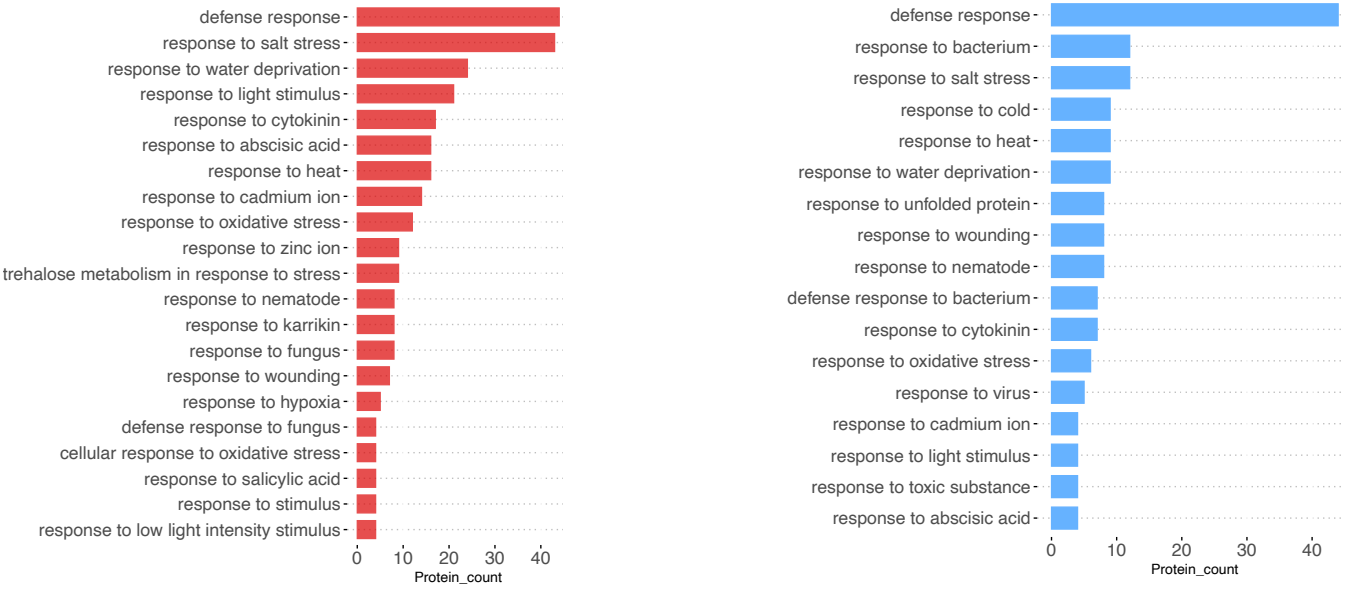

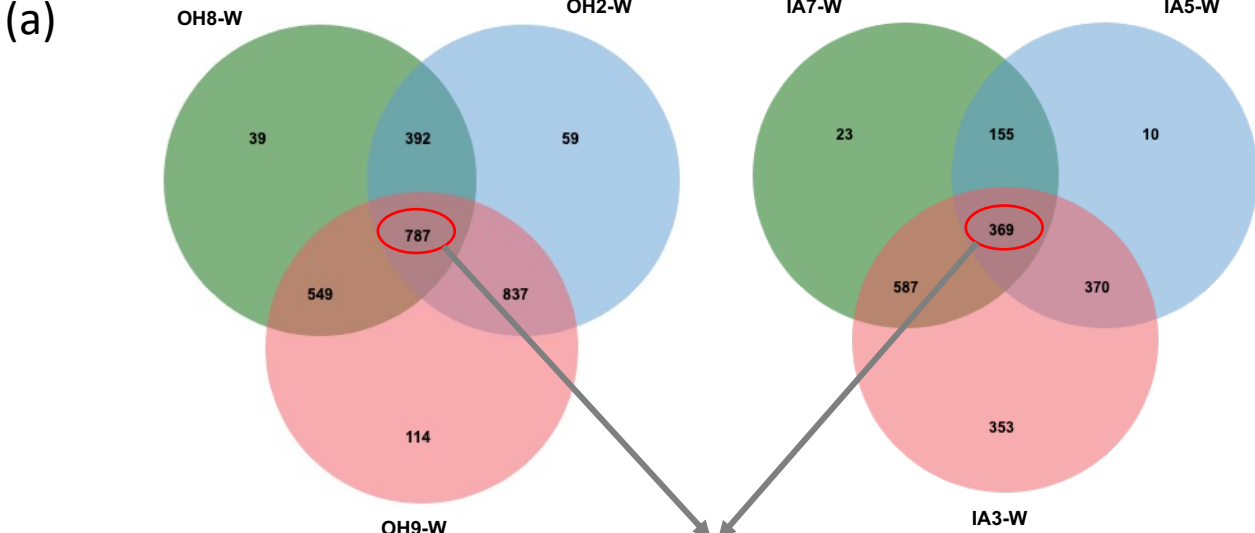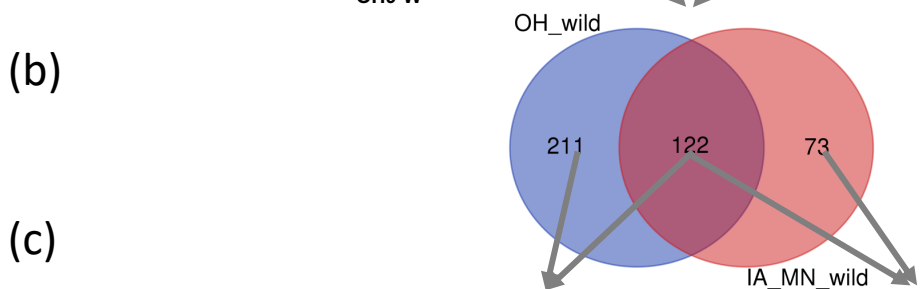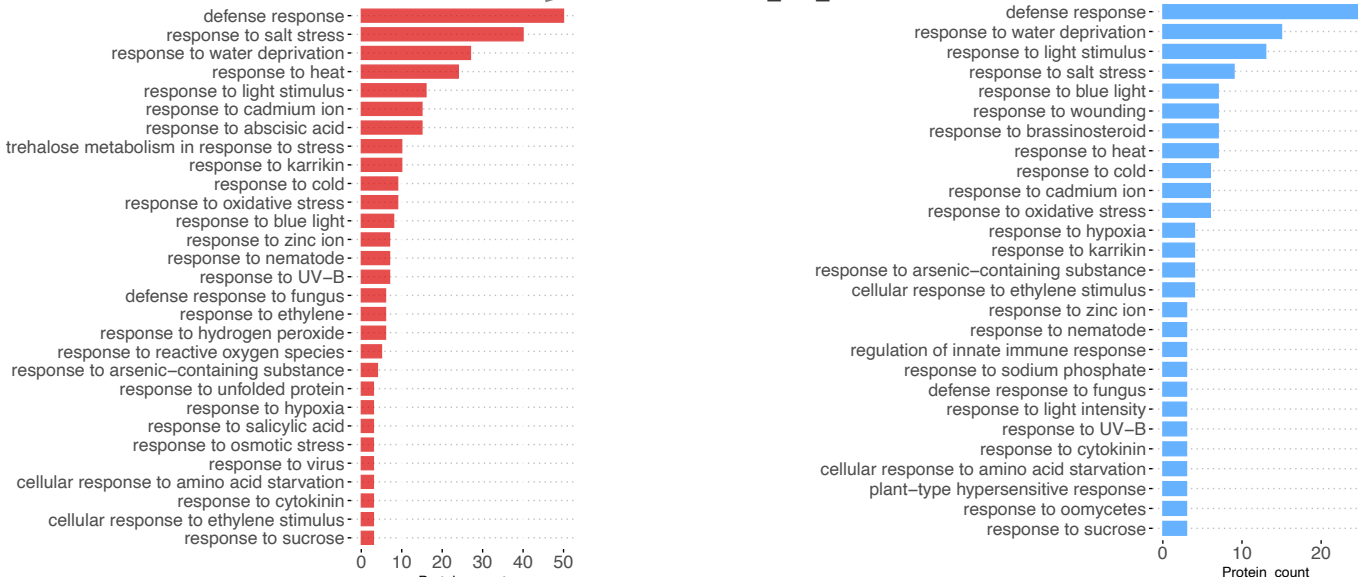

Supplemental Figure S9

(a)

Weedy

Wild

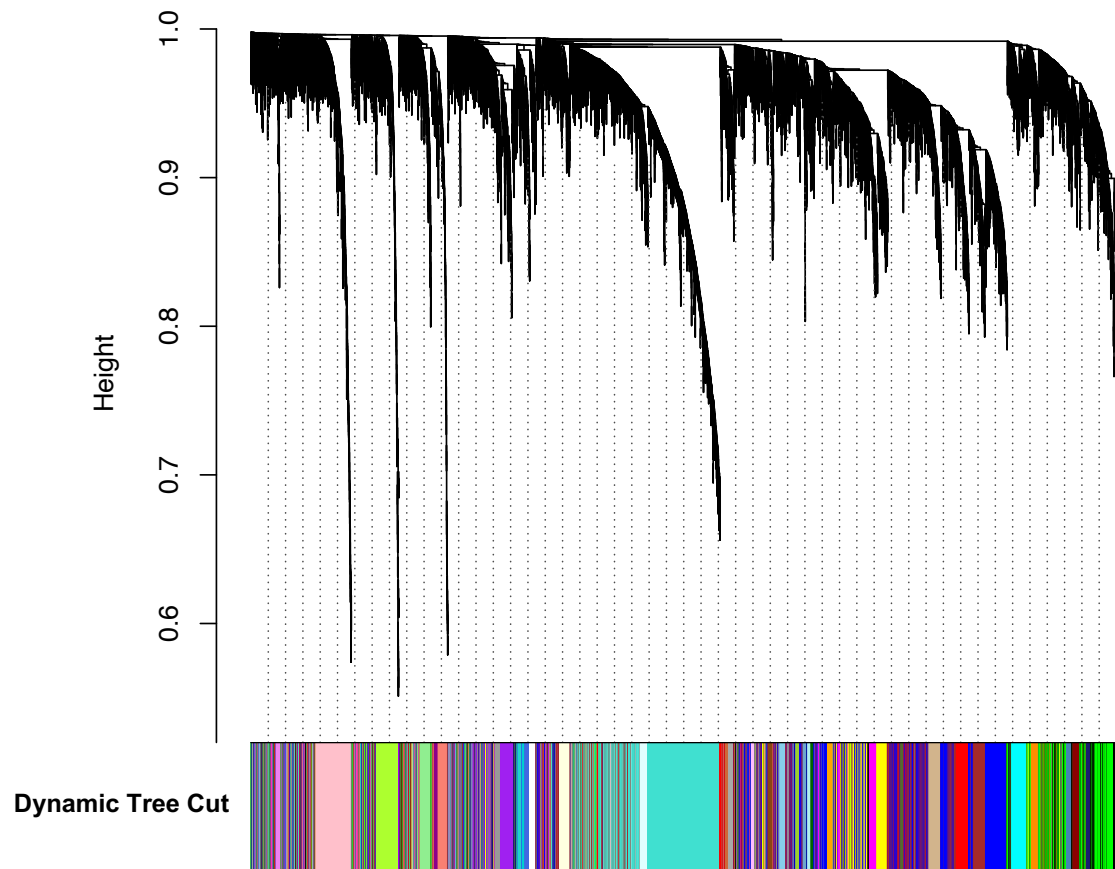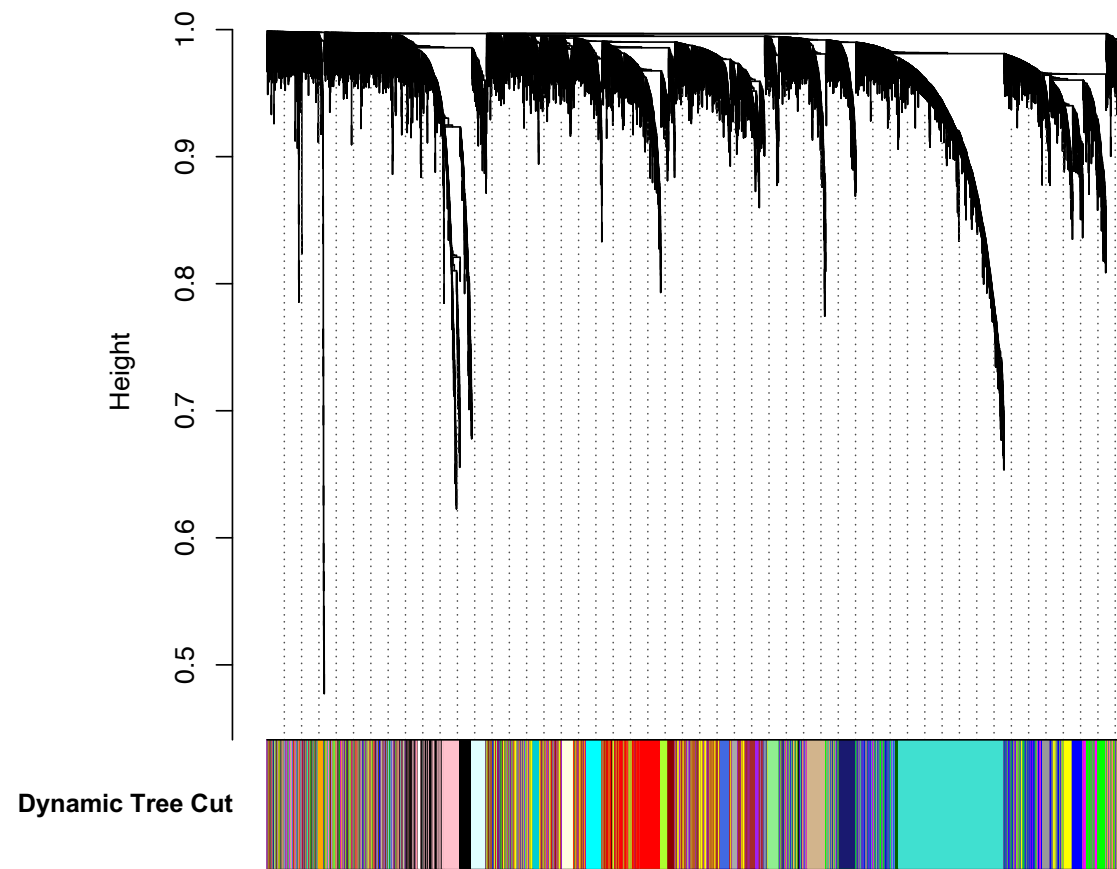

(b)

# Correspondence of weedy and wild modules

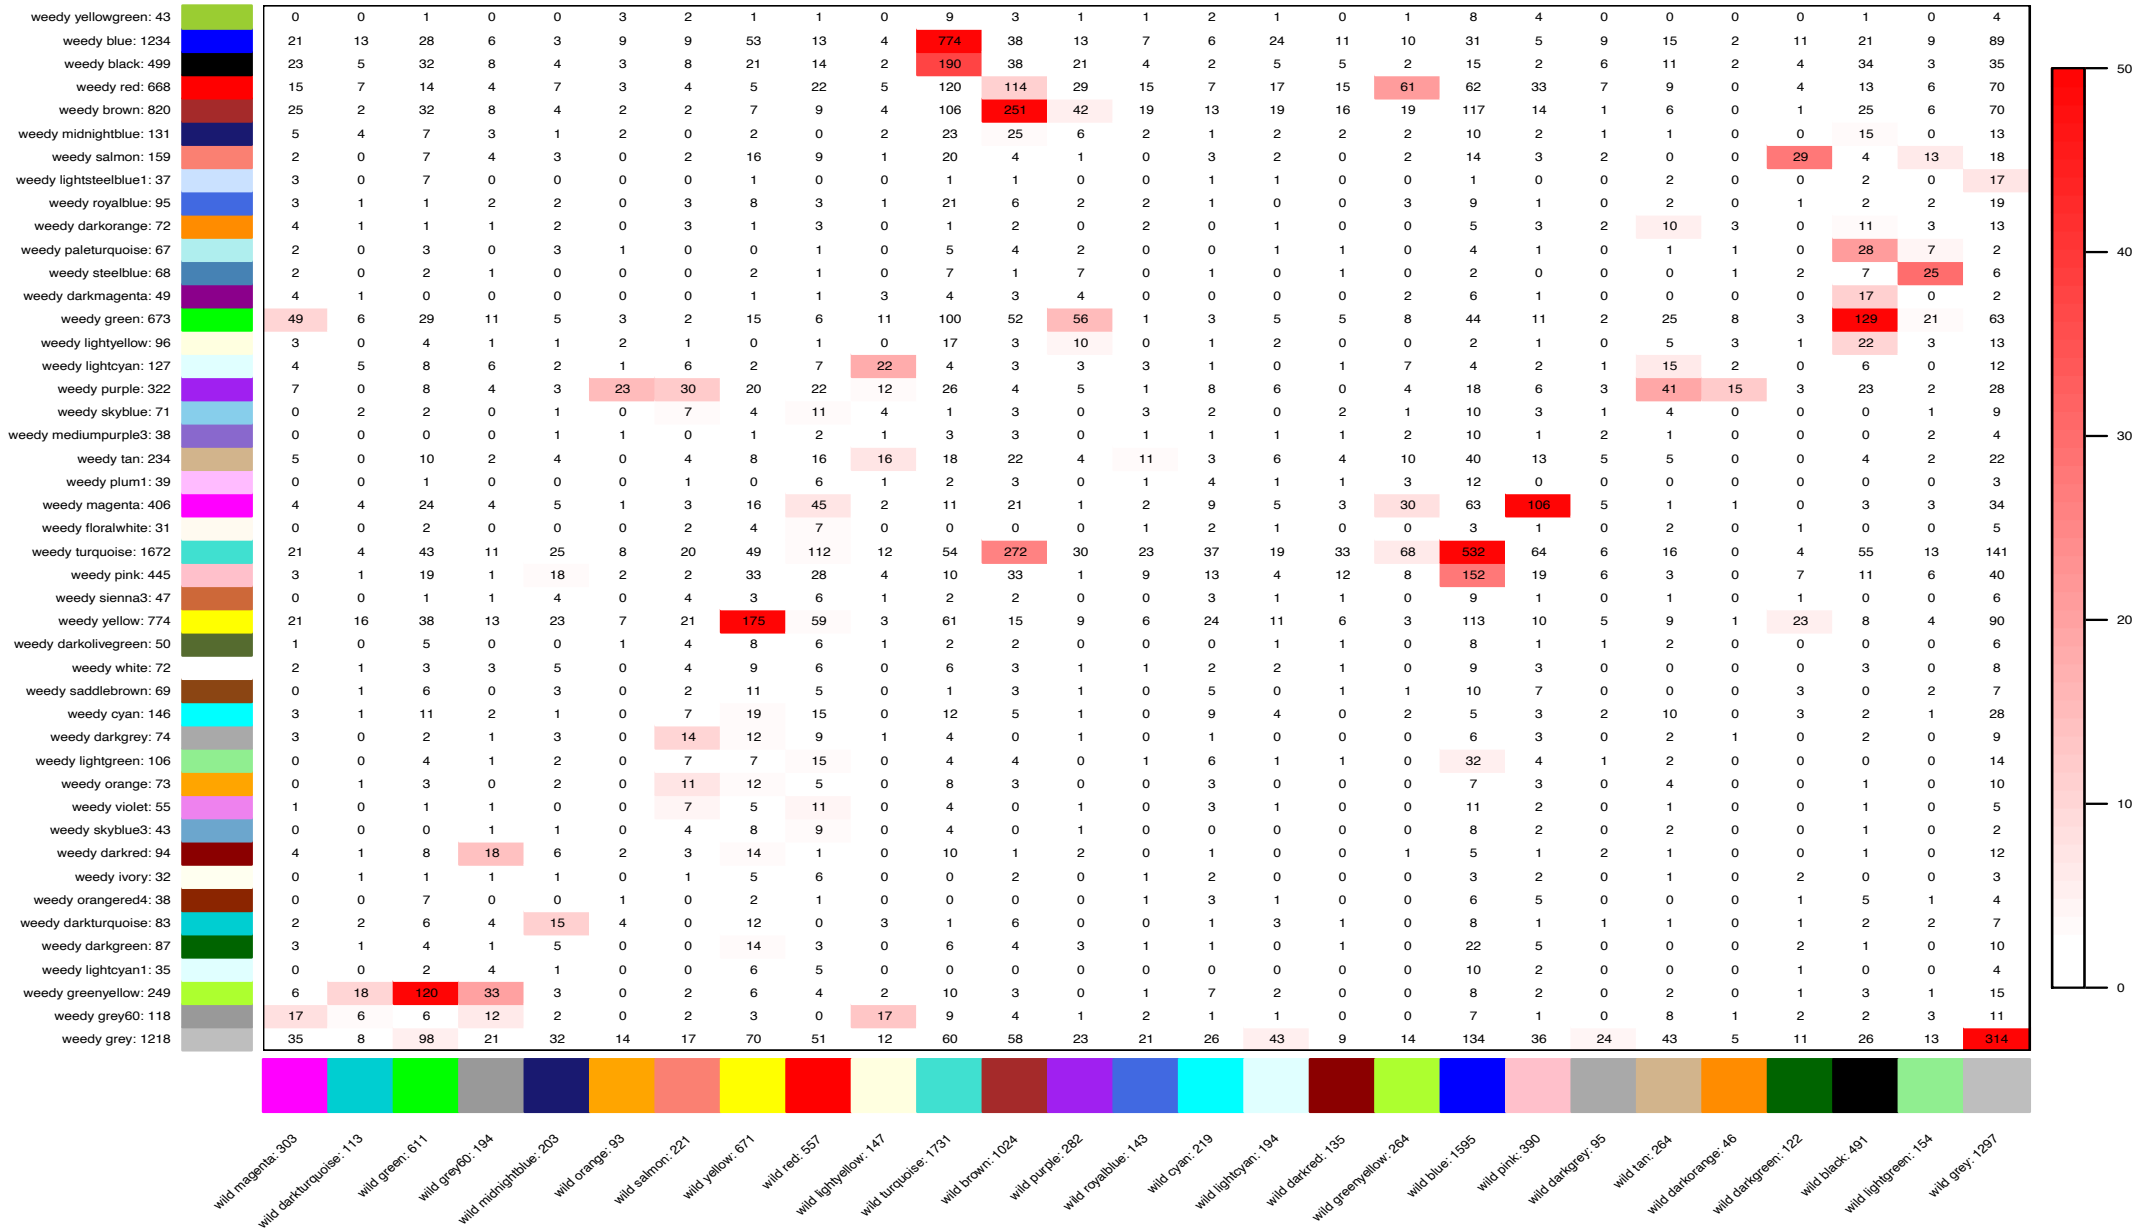

(c)

### Conserved modules

| Gene module  | Representative GO annotation |
|--------------|------------------------------|
| Blue         | Ribosome biogenesis          |
| Brown        | DNA replication              |
| Black        | Ribosome biogenesis          |
| Green        | Photosynthesis               |
| Green yellow | Calcium ion binding          |
| Magenta      | Motor activity               |
| Turquoise    | DNA repair                   |
| Yellow       | Autophagy                    |

### Variable modules

| Gene module    | Representative GO annotation                   |
|----------------|------------------------------------------------|
| Yellow green   | Autophagy                                      |
| Royal blue     | branched-chain amino acid biosynthetic process |
| Plum1          | peptidyl-serine phosphorylation                |
| Floral white   | xenobiotic transport                           |
| Cyan           | cellulose biosynthetic process                 |
| Dark Green     | transcription factor binding                   |
| Light cyan1    | endoplasmic reticulum                          |
| Medium purple3 | Golgi transport                                |

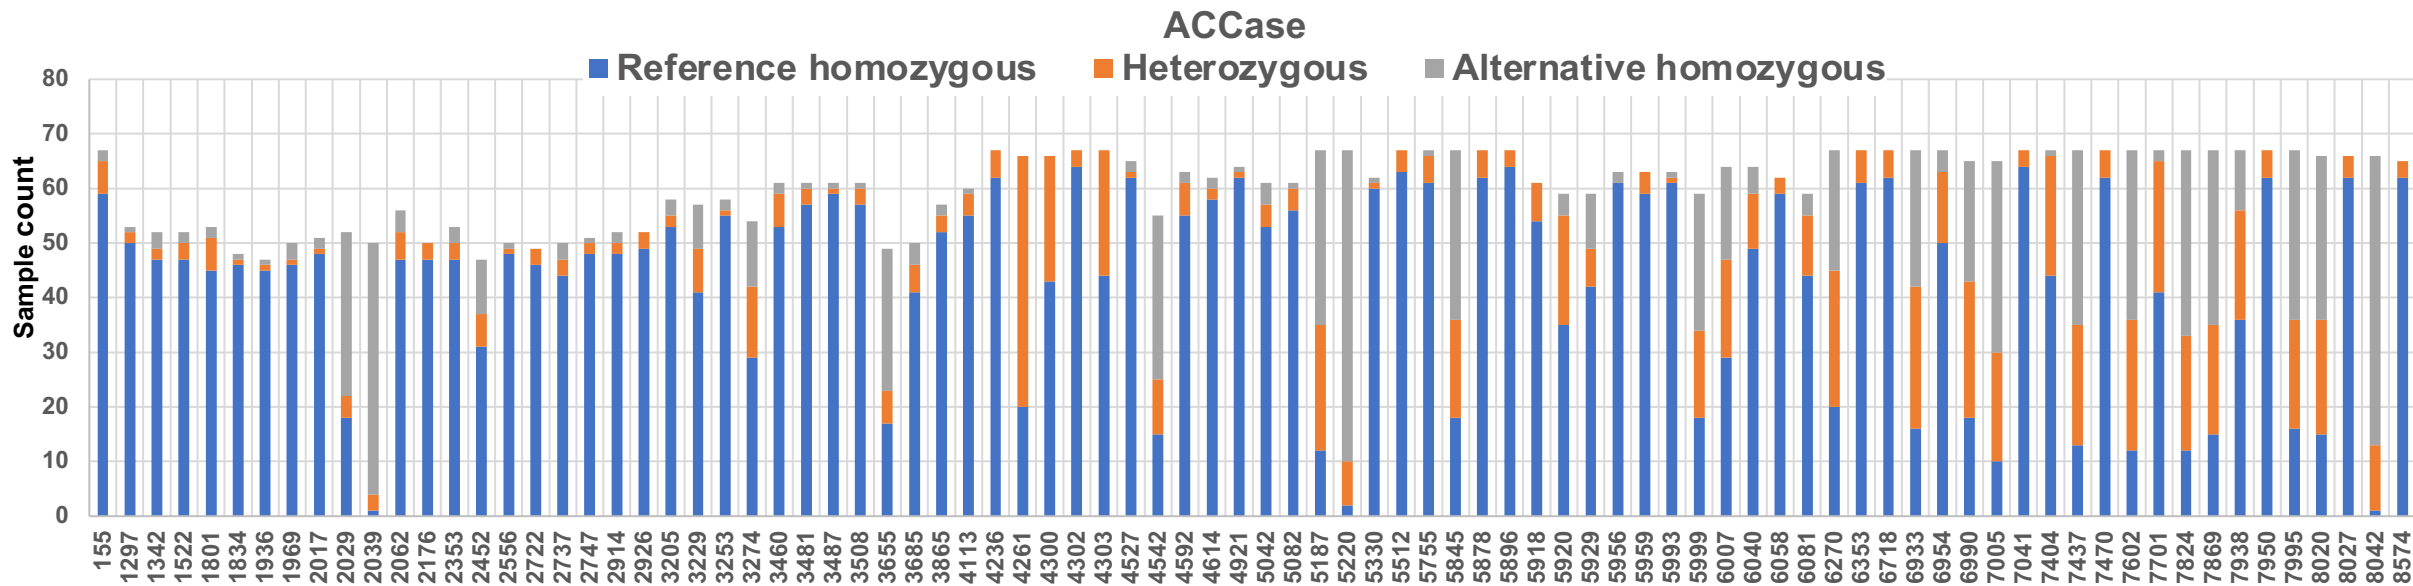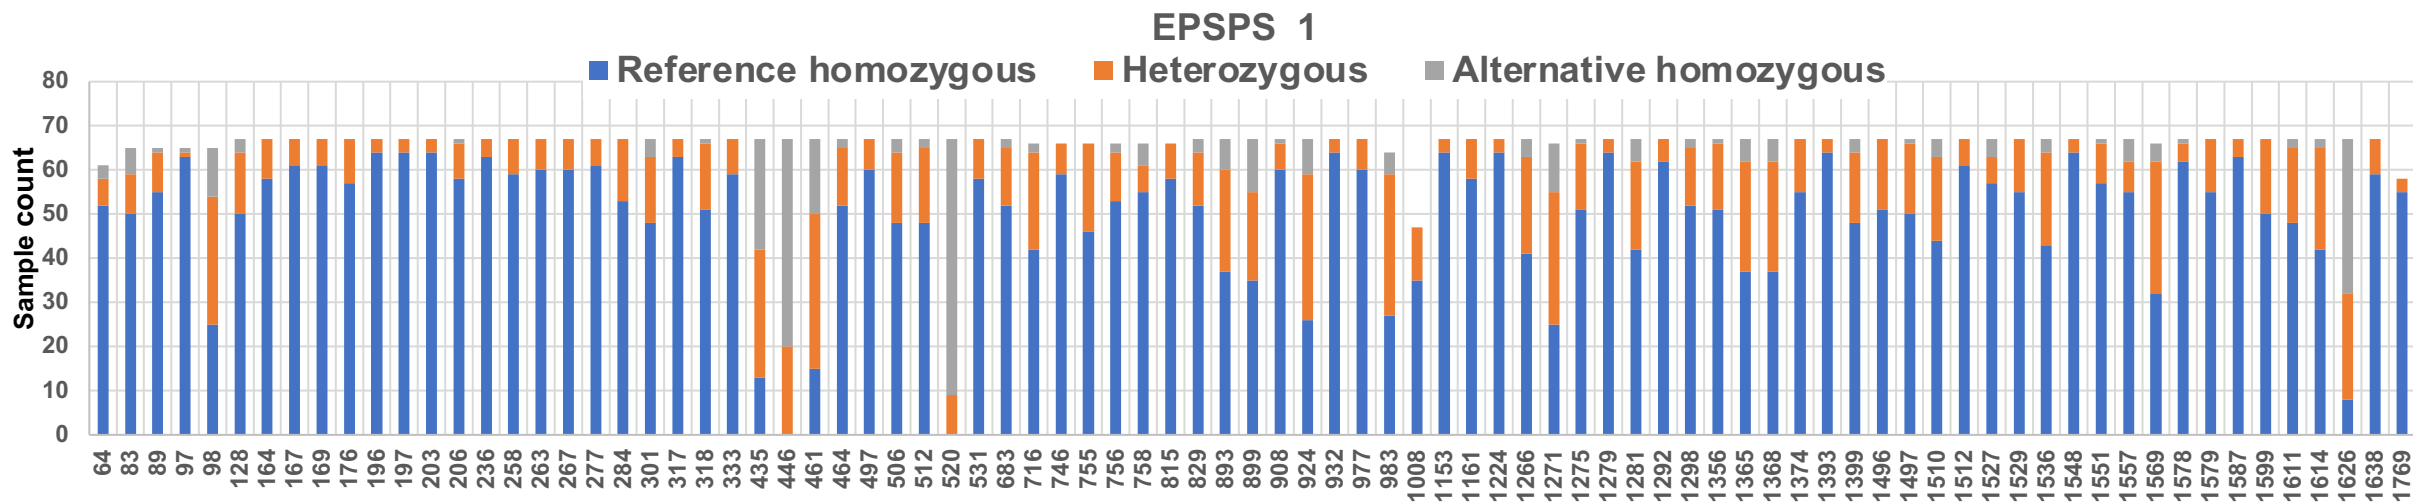

Supplemental Figure S11

### EPSPS\_2

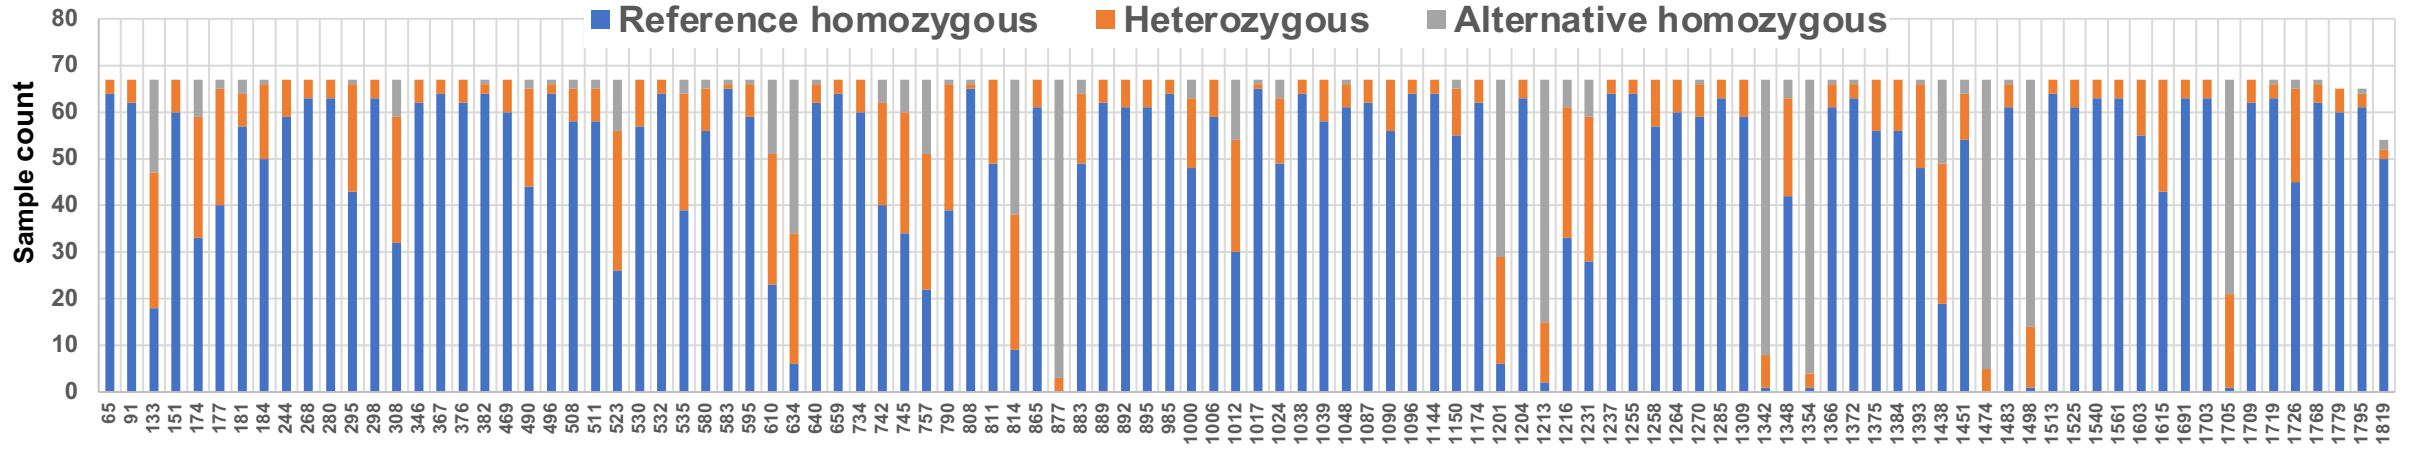

### GS

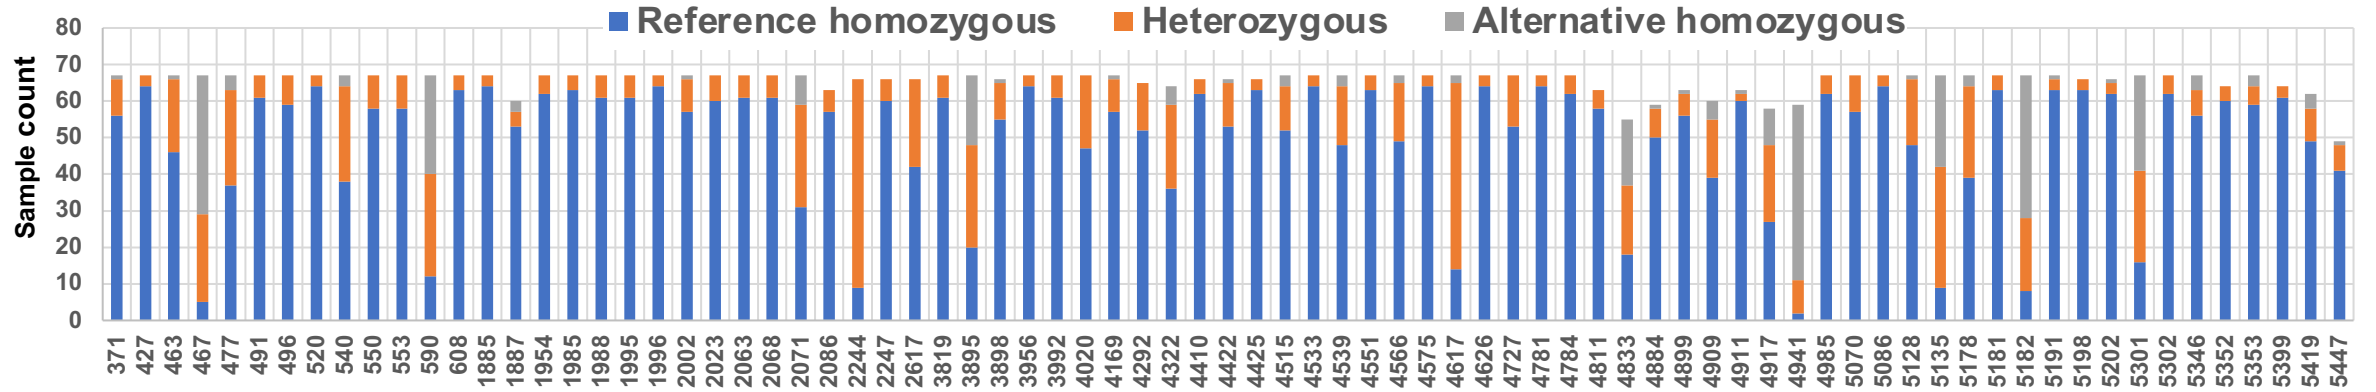



### HPPD

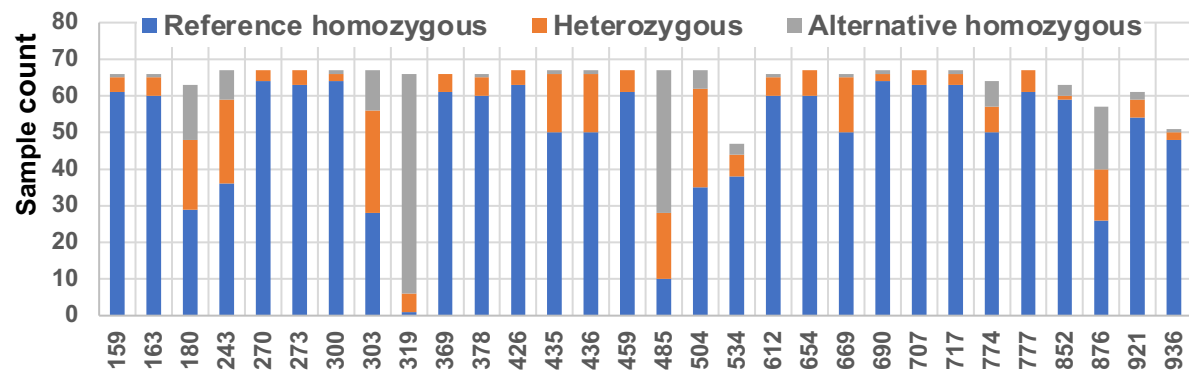

### PDS

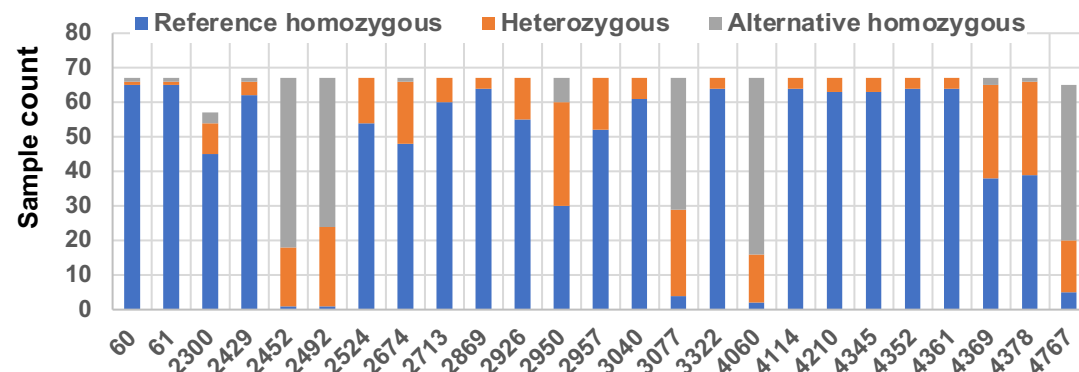

### PPO

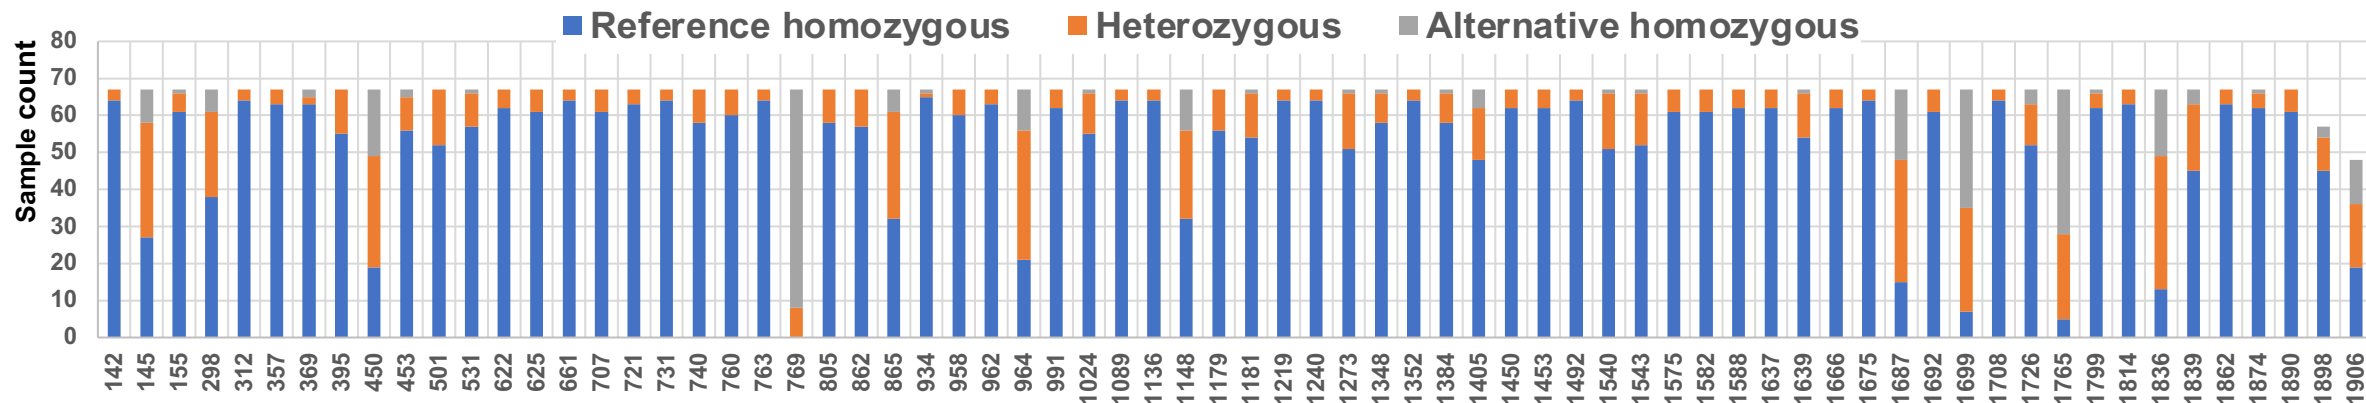

Supplement: ECE3-12-e9590-s003.pdf [file ECE3-12-e9590-s003.pdf]
