# Supplementary material for: Evolution of weedy giant ragweed (Ambrosia trifida): Multiple origins and gene expression variability facilitates weediness
Source: PubMed Central journal article supplement (PMC9731915; doi:10.1002/ece3.9590), 2022-12-08
Supplement: ECE3-12-e9590-s002.pdf [file ECE3-12-e9590-s002.pdf]

Table S1. Population information of giant ragweed for RNA-seq.

| Sample Number | Sample name | Population name | State | Habitats | Original Sample Name (NCBI submitted) | Note                        |
|---------------|-------------|-----------------|-------|----------|---------------------------------------|-----------------------------|
| 1             | OH1-A-1     | OH1-A           | Ohio  | Weedy    | Loc6-1-10A                            |                             |
| 2             | OH1-A-2     | OH1-A           | Ohio  | Weedy    | Loc6-2-8A                             |                             |
| 3             | OH1-A-3     | OH1-A           | Ohio  | Weedy    | Loc6-4-8A                             |                             |
| 4             | OH2-W-1     | OH2-W           | Ohio  | Wild     | r23-1-2B                              |                             |
| 5             | OH2-W-2     | OH2-W           | Ohio  | Wild     | r23-2-10B                             |                             |
| 6             | OH2-W-3     | OH2-W           | Ohio  | Wild     | r23-3-8A                              |                             |
| 7             | OH2-W-4     | OH2-W           | Ohio  | Wild     | r23-4-9B                              |                             |
| 8             | OH3-W-1     | OH3-W           | Ohio  | Wild     | r24-1-1A                              |                             |
| 9             | OH3-W-2     | OH3-W           | Ohio  | Wild     | r24-1-4B                              |                             |
| 10            | OH3-W-3     | OH3-W           | Ohio  | Wild     | r24-2-2A                              |                             |
| 11            | OH3-W-4     | OH3-W           | Ohio  | Wild     | r24-3-5B                              |                             |
| 12            | OH3-W-5     | OH3-W           | Ohio  | Wild     | r24-4.1A                              |                             |
| 13            | OH4-A-1     | OH4-A           | Ohio  | Weedy    | IPO-1-4B                              | OH4-A adjacent to OH5-W     |
| 14            | OH4-A-2     | OH4-A           | Ohio  | Weedy    | IPO-2-3B                              |                             |
| 15            | OH4-A-3     | OH4-A           | Ohio  | Weedy    | IPO-3-5A                              |                             |
| 16            | OH4-A-4     | OH4-A           | Ohio  | Weedy    | IPO-3-5B                              |                             |
| 17            | OH5-W-1     | OH5-W           | Ohio  | Wild     | RPO-3-3A                              | OH5-W adjacent to OH4-A     |
| 18            | OH5-W-2     | OH5-W           | Ohio  | Wild     | RPO-3-3B                              |                             |
| 19            | OH6-W-1     | OH6-W           | Ohio  | Wild     | r26-3-9A                              |                             |
| 20            | OH6-W-2     | OH6-W           | Ohio  | Wild     | r26-1-8B                              |                             |
| 21            | OH6-W-3     | OH6-W           | Ohio  | Wild     | r26-2-4A                              | Used for reference assembly |
| 22            | OH7-A-1     | OH7-A           | Ohio  | Weedy    | CIPO-2-1A                             | OH7-A adjacent to OH8-W     |
| 23            | OH7-A-2     | OH7-A           | Ohio  | Weedy    | CIPO-3-3A                             |                             |
| 24            | OH7-A-3     | OH7-A           | Ohio  | Weedy    | CIPO-4-3A                             |                             |
| 25            | OH7-A-4     | OH7-A           | Ohio  | Weedy    | CIPO-4-2B                             |                             |
| 26            | OH8-W-1     | OH8-W           | Ohio  | Wild     | CUPO-2-5A                             | OH8-W adjacent to OH7-A     |
| 27            | OH8-W-2     | OH8-W           | Ohio  | Wild     | CUPO-3-1B                             |                             |
| 28            | OH8-W-3     | OH8-W           | Ohio  | Wild     | CUPO-4-3A                             |                             |
| 29            | OH9-W-1     | OH9-W           | Ohio  | Wild     | rw2-1-10A                             |                             |
| 30            | OH9-W-2     | OH9-W           | Ohio  | Wild     | rw2-3-2A                              |                             |
| 31            | OH9-W-3     | OH9-W           | Ohio  | Wild     | rw2-2-7B                              |                             |
| 32            | OH9-W-4     | OH9-W           | Ohio  | Wild     | rw2-4-4A                              |                             |
| 33            | OH10-A-1    | OH10-A          | Ohio  | Weedy    | rw3-3-5A                              |                             |
| 34            | OH10-A-2    | OH10-A          | Ohio  | Weedy    | rw3-4-8B                              |                             |
| 35            | OH10-A-3    | OH10-A          | Ohio  | Weedy    | rw3-1-7A                              |                             |

|    |          |        |           |       |            |                         |
|----|----------|--------|-----------|-------|------------|-------------------------|
| 36 | OH10-A-4 | OH10-A | Ohio      | Weedy | rw3-2-9A   |                         |
| 37 | IA1-A-1  | IA1-A  | Iowa      | Weedy | rw14-2-5B  |                         |
| 38 | IA1-A-2  | IA1-A  | Iowa      | Weedy | rw14-3-2A  |                         |
| 39 | IA1-A-3  | IA1-A  | Iowa      | Weedy | rw14-1-5B  |                         |
| 40 | IA1-A-4  | IA1-A  | Iowa      | Weedy | rw14-4-4B  |                         |
| 41 | IA2-W-1  | IA2-W  | Iowa      | Wild  | rw15-2-5A  |                         |
| 42 | IA2-W-2  | IA2-W  | Iowa      | Wild  | rw15-4-6A  |                         |
| 43 | IA3-W-1  | IA3-W  | Iowa      | Wild  | rw16-1-5B  |                         |
| 44 | IA3-W-2  | IA3-W  | Iowa      | Wild  | rw16-2-7A  |                         |
| 45 | IA3-W-3  | IA3-W  | Iowa      | Wild  | rw16-3-5B  |                         |
| 46 | IA3-W-4  | IA3-W  | Iowa      | Wild  | rw16-4-2B  |                         |
| 47 | IA4-A-1  | IA4-A  | Iowa      | Weedy | EII-1-3A   | IA4-A adjacent to IA5-W |
| 58 | IA4-A-2  | IA4-A  | Iowa      | Weedy | EII-4-5A   |                         |
| 49 | IA5-W-1  | IA5-W  | Iowa      | Wild  | ERI-1-1A   | IA5-W adjacent to IA4-A |
| 50 | IA5-W-2  | IA5-W  | Iowa      | Wild  | ERI-3-5A   |                         |
| 51 | IA6-A-1  | IA6-A  | Iowa      | Weedy | BII-1-3A   | IA6-A adjacent to IA7-W |
| 52 | IA6-A-2  | IA6-A  | Iowa      | Weedy | BII-4-5B   |                         |
| 53 | IA7-W-1  | IA7-W  | Iowa      | Wild  | BUPI-1-1B  | IA7-W adjacent to IA6-A |
| 54 | IA7-W-2  | IA7-W  | Iowa      | Wild  | BUPI-2-2A  |                         |
| 55 | MN1-W-1  | MN1-W  | Minnesota | Wild  | r21-1-8B   |                         |
| 56 | MN1-W-2  | MN1-W  | Minnesota | Wild  | r21-1-10A  |                         |
| 57 | MN1-W-3  | MN1-W  | Minnesota | Wild  | r21-3-4A   |                         |
| 58 | MN1-W-4  | MN1-W  | Minnesota | Wild  | r21-4-6A   |                         |
| 59 | MN2-W-1  | MN2-W  | Minnesota | Wild  | rw20-1-10A |                         |
| 60 | MN2-W-2  | MN2-W  | Minnesota | Wild  | rw20-2-1A  |                         |
| 61 | MN2-W-3  | MN2-W  | Minnesota | Wild  | rw20-2-2A  |                         |
| 62 | MN2-W-4  | MN2-W  | Minnesota | Wild  | rw20-3-5A  |                         |
| 63 | MN2-W-5  | MN2-W  | Minnesota | Wild  | rw20-4-8B  |                         |
| 64 | MN3-A-1  | MN3-A  | Minnesota | Weedy | rw19-1-5A  |                         |
| 65 | MN3-A-2  | MN3-A  | Minnesota | Weedy | rw19-2-2A  |                         |
| 66 | MN3-A-3  | MN3-A  | Minnesota | Weedy | rw19-3-4A  |                         |
| 67 | MN3-A-4  | MN3-A  | Minnesota | Weedy | rw19-4-5B  |                         |

Table S2. Summary of reference transcriptomes for giant ragweed.

|                                   | <b>Full transcriptome</b> | <b>Filtered transcriptome</b> |
|-----------------------------------|---------------------------|-------------------------------|
| <b>Total trinity genes</b>        | 66747                     | 41669                         |
| <b>Total trinity transcripts</b>  | 144256                    | 91296                         |
| <b>Percent GC (%)</b>             | 40.18                     | 40.73                         |
| <b>Contig N10 (bp)</b>            | 3443                      | 3652                          |
| <b>Contig N20 (bp)</b>            | 2703                      | 2904                          |
| <b>Contig N30 (bp)</b>            | 2240                      | 2429                          |
| <b>Contig N40 (bp)</b>            | 1912                      | 2087                          |
| <b>Contig N50 (bp)</b>            | 1631                      | 1809                          |
| <b>Median contig length (bp)</b>  | 772                       | 1075                          |
| <b>Average contig (bp)</b>        | 1066.25                   | 1295.18                       |
| <b>Total assembled bases (bp)</b> | 153812893                 | 118244712                     |

Table S3. Summary of variant calling results.

|                                 |           |
|---------------------------------|-----------|
| <b>Sample Size</b>              | <b>67</b> |
| GATK callset                    | 3618989   |
| SNPs                            | 3267439   |
| Indels                          | 407949    |
| Filter by vcftools              | 875381    |
| Filter by biological replicates | 616607    |
| Ts/Tv                           | 2.18      |

Table S4: Population statistics for each population.

| Population | Latitude (N) | longitude(W) | N | Habitat | Ho     | He     | $\pi$  |
|------------|--------------|--------------|---|---------|--------|--------|--------|
| <b>OH</b>  |              |              |   |         |        |        |        |
| OH1-A      | 40.33        | -83          | 3 | Weedy   | 0.1138 | 0.1775 | 0.0024 |
| OH2-W      | 40.11        | -83.21       | 4 | Wild    | 0.1275 | 0.1774 | 0.0024 |
| OH3-W      | 40.09        | -83.25       | 5 | Wild    | 0.1261 | 0.1775 | 0.0026 |
| OH4-A      | 39.84        | -83.25       | 4 | Weedy   | 0.1263 | 0.177  | 0.002  |
| OH5-W      | 39.84        | -83.25       | 2 | Wild    | 0.0738 | 0.1743 | NA     |
| OH6-W      | 39.89        | -83.32       | 3 | Wild    | 0.1244 | 0.1775 | 0.0023 |
| OH7-A      | 39.86        | -83.66       | 4 | Weedy   | 0.1317 | 0.1774 | 0.0027 |
| OH8-W      | 39.86        | -83.66       | 3 | Wild    | 0.1244 | 0.1774 | 0.0027 |
| OH9-W      | 40.5         | -83.78       | 4 | Wild    | 0.1363 | 0.1774 | 0.0024 |
| OH10-A     | 40.82        | -84.27       | 4 | Weedy   | 0.1636 | 0.1779 | 0.0026 |
| <b>IA</b>  |              |              |   |         |        |        |        |
| IA1-A      | 42.05        | -90.35       | 4 | Weedy   | 0.1617 | 0.1778 | 0.0025 |
| IA2-W      | 42.12        | -90.77       | 2 | Wild    | 0.1816 | 0.1781 | 0.0027 |
| IA3-W      | 42.18        | -90.79       | 4 | Wild    | 0.1584 | 0.1779 | 0.0025 |
| IA4-A      | 42.66        | -91.49       | 2 | Weedy   | 0.1007 | 0.1761 | 0.002  |
| IA5-W      | 42.66        | -91.49       | 2 | Wild    | 0.1174 | 0.1765 | 0.0022 |
| IA6-A      | 41.54        | -93.33       | 2 | Weedy   | 0.1287 | 0.1771 | 0.0023 |
| IA7-W      | 41.54        | -93.33       | 2 | Wild    | 0.1222 | 0.1769 | 0.0023 |
| <b>MN</b>  |              |              |   |         |        |        |        |
| MN1-W      | 43.84        | -92.3        | 4 | Wild    | 0.125  | 0.1772 | 0.0024 |
| MN2-W      | 44.02        | -92.39       | 5 | Wild    | 0.1252 | 0.1771 | 0.0022 |
| MN3-A      | 44.01        | -92.41       | 4 | Weedy   | 0.1248 | 0.1773 | 0.0024 |

Table S5: Pairwise  $F_{ST}$  among giant ragweed populations

|        | IA1-A | IA2-W | IA3-W | IA4-A | IA5-W | IA6-A | IA7-W  | MN1-W | MN2-W | MN3-A | OH1-A | OH10-A | OH2-W | OH3-W | OH4-A | OH6-W | OH7-A | OH8-W | OH9-W |
|--------|-------|-------|-------|-------|-------|-------|--------|-------|-------|-------|-------|--------|-------|-------|-------|-------|-------|-------|-------|
| IA1-A  | -     | 0.045 | 0.063 | 0.067 | 0.068 | 0.063 | 0.059  | 0.059 | 0.052 | 0.04  | 0.087 | 0.061  | 0.07  | 0.08  | 0.109 | 0.071 | 0.072 | 0.091 | 0.058 |
| IA2-W  | 0.045 | -     | 0.032 | 0.038 | 0.047 | 0.04  | 0.039  | 0.03  | 0.014 | 0.011 | 0.059 | 0.043  | 0.044 | 0.058 | 0.095 | 0.063 | 0.061 | 0.07  | 0.034 |
| IA3-W  | 0.063 | 0.032 | -     | 0.054 | 0.057 | 0.05  | 0.049  | 0.048 | 0.039 | 0.033 | 0.077 | 0.052  | 0.061 | 0.07  | 0.1   | 0.064 | 0.072 | 0.083 | 0.049 |
| IA4-A  | 0.067 | 0.038 | 0.054 | -     | 0.023 | 0.002 | 0.011  | 0.033 | 0.02  | 0.004 | 0.054 | 0.055  | 0.041 | 0.059 | 0.1   | 0.055 | 0.059 | 0.065 | 0.042 |
| IA5-W  | 0.068 | 0.047 | 0.057 | 0.023 | -     | 0.022 | 0.008  | 0.032 | 0.029 | 0.006 | 0.042 | 0.048  | 0.04  | 0.049 | 0.086 | 0.05  | 0.049 | 0.058 | 0.032 |
| IA6-A  | 0.063 | 0.04  | 0.05  | 0.002 | 0.022 | -     | 0.005  | 0.032 | 0.024 | 0.002 | 0.048 | 0.046  | 0.036 | 0.051 | 0.089 | 0.054 | 0.048 | 0.054 | 0.037 |
| IA7-W  | 0.059 | 0.039 | 0.049 | 0.011 | 0.008 | 0.005 | -      | 0.022 | 0.023 | 0.003 | 0.041 | 0.043  | 0.037 | 0.05  | 0.085 | 0.047 | 0.047 | 0.054 | 0.029 |
| MN1-W  | 0.059 | 0.03  | 0.048 | 0.033 | 0.032 | 0.032 | 0.022  | -     | 0.03  | 0.017 | 0.066 | 0.05   | 0.051 | 0.063 | 0.089 | 0.045 | 0.064 | 0.072 | 0.041 |
| MN2-W  | 0.052 | 0.014 | 0.039 | 0.02  | 0.029 | 0.024 | 0.023  | 0.03  | -     | 0.016 | 0.061 | 0.044  | 0.044 | 0.058 | 0.084 | 0.038 | 0.059 | 0.067 | 0.036 |
| MN3-A  | 0.04  | 0.011 | 0.033 | 0.004 | 0.006 | 0.002 | -0.003 | 0.017 | 0.016 | -     | 0.045 | 0.03   | 0.033 | 0.045 | 0.073 | 0.024 | 0.043 | 0.051 | 0.025 |
| OH1-A  | 0.087 | 0.059 | 0.077 | 0.054 | 0.042 | 0.048 | 0.041  | 0.066 | 0.061 | 0.045 | -     | 0.041  | 0.026 | 0.034 | 0.063 | 0.025 | 0.034 | 0.039 | 0.024 |
| OH10-A | 0.061 | 0.043 | 0.052 | 0.055 | 0.048 | 0.046 | 0.043  | 0.05  | 0.044 | 0.03  | 0.041 | -      | 0.026 | 0.033 | 0.067 | 0.024 | 0.036 | 0.045 | 0.018 |
| OH2-W  | 0.07  | 0.044 | 0.061 | 0.041 | 0.04  | 0.036 | 0.037  | 0.051 | 0.044 | 0.033 | 0.026 | 0.026  | -     | 0.02  | 0.052 | 0.008 | 0.021 | 0.031 | 0.013 |
| OH3-W  | 0.08  | 0.058 | 0.07  | 0.059 | 0.049 | 0.051 | 0.05   | 0.063 | 0.058 | 0.045 | 0.034 | 0.033  | 0.02  | -     | 0.057 | 0.015 | 0.028 | 0.038 | 0.019 |
| OH4-A  | 0.109 | 0.095 | 0.1   | 0.1   | 0.086 | 0.089 | 0.085  | 0.089 | 0.084 | 0.073 | 0.063 | 0.067  | 0.052 | 0.057 | -     | 0.05  | 0.059 | 0.07  | 0.05  |
| OH6-W  | 0.071 | 0.063 | 0.064 | 0.055 | 0.05  | 0.054 | 0.047  | 0.045 | 0.038 | 0.024 | 0.025 | 0.024  | 0.008 | 0.015 | 0.05  | -     | 0.019 | 0.034 | 0.007 |
| OH7-A  | 0.072 | 0.061 | 0.072 | 0.059 | 0.049 | 0.048 | 0.047  | 0.064 | 0.059 | 0.043 | 0.034 | 0.036  | 0.021 | 0.028 | 0.059 | 0.019 | -     | 0.023 | 0.022 |
| OH8-W  | 0.091 | 0.07  | 0.083 | 0.065 | 0.058 | 0.054 | 0.054  | 0.072 | 0.067 | 0.051 | 0.039 | 0.045  | 0.031 | 0.038 | 0.07  | 0.034 | 0.023 | -     | 0.03  |
| OH9-W  | 0.058 | 0.034 | 0.049 | 0.042 | 0.032 | 0.037 | 0.029  | 0.041 | 0.036 | 0.025 | 0.024 | 0.018  | 0.013 | 0.019 | 0.05  | 0.007 | 0.022 | 0.03  | -     |

Table S6. de novo assembly of unmapped reads to detect unique transcripts for paired weedy populations.

| <b>Population</b> | <b>Sample name</b> | <b>Mapping rate (%)</b> | <b>Total assembled transcript</b> | <b>Unique transcript</b> | <b>Unique transcript with ORF</b> |
|-------------------|--------------------|-------------------------|-----------------------------------|--------------------------|-----------------------------------|
| <b>OH1-A</b>      | <b>OH1-A-1</b>     | 79.71                   | 43242                             | 8537                     | 2936                              |
|                   | <b>OH1-A-2</b>     | 78.98                   |                                   |                          |                                   |
|                   | <b>OH1-A-3</b>     | 78.91                   |                                   |                          |                                   |
| <b>OH4-A</b>      | <b>OH4-A-1</b>     | 79.84                   | 45131                             | 9692                     | 3313                              |
|                   | <b>OH4-A-2</b>     | 69.75                   |                                   |                          |                                   |
|                   | <b>OH4-A-3</b>     | 79.04                   |                                   |                          |                                   |
|                   | <b>OH4-A-4</b>     | 78.77                   |                                   |                          |                                   |
| <b>OH7-A</b>      | <b>OH7-A-1</b>     | 79.29                   | 49919                             | 11457                    | 4177                              |
|                   | <b>OH7-A-2</b>     | 79.2                    |                                   |                          |                                   |
|                   | <b>OH7-A-3</b>     | 80.09                   |                                   |                          |                                   |
|                   | <b>OH7-A-4</b>     | 77.13                   |                                   |                          |                                   |
| <b>OH10-A</b>     | <b>OH10-A-1</b>    | 77.34                   | 59710                             | 23492                    | 6155                              |
|                   | <b>OH10-A-2</b>    | 76.91                   |                                   |                          |                                   |
|                   | <b>OH10-A-3</b>    | 70.45                   |                                   |                          |                                   |
|                   | <b>OH10-A-4</b>    | 73.33                   |                                   |                          |                                   |
| <b>IA1-A</b>      | <b>IA1-A-1</b>     | 67.19                   | 61346                             | 24639                    | 6345                              |
|                   | <b>IA1-A-2</b>     | 66.98                   |                                   |                          |                                   |
|                   | <b>IA1-A-3</b>     | 64.57                   |                                   |                          |                                   |
|                   | <b>IA1-A-4</b>     | 69.87                   |                                   |                          |                                   |
| <b>IA4-A</b>      | <b>IA4-A-1</b>     | 61.35                   | 26694                             | 4510                     | 1136                              |
|                   | <b>IA4-A-2</b>     | 63.66                   |                                   |                          |                                   |
| <b>IA6-A</b>      | <b>IA6-A-1</b>     | 64.81                   | 34570                             | 7404                     | 1969                              |
|                   | <b>IA6-A-2</b>     | 65.65                   |                                   |                          |                                   |
| <b>MN3-A</b>      | <b>MN3-A-1</b>     | 62.28                   | 47764                             | 13457                    | 4090                              |
|                   | <b>MN3-A-2</b>     | 61.58                   |                                   |                          |                                   |
|                   | <b>MN3-A-3</b>     | 62.46                   |                                   |                          |                                   |
|                   | <b>MN3-A-4</b>     | 63.9                    |                                   |                          |                                   |

Table\_S7\_Functional\_annotation\_summary (see an additional Excel spreadsheet).

Table S8. de novo assembly of unmapped reads to detect unique transcripts for paired wild populations.

| <b>Population</b> | <b>Sample name</b> | <b>Mapping rate (%)</b> | <b>Total assembled transcript</b> | <b>Unique transcript</b> | <b>Unique transcript with ORF</b> |
|-------------------|--------------------|-------------------------|-----------------------------------|--------------------------|-----------------------------------|
| <b>OH2-W</b>      | <b>OH2-W-1</b>     | 79.07                   | 48398                             | 13402                    | 4200                              |
|                   | <b>OH2-W-2</b>     | 79.34                   |                                   |                          |                                   |
|                   | <b>OH2-W-3</b>     | 79.00                   |                                   |                          |                                   |
|                   | <b>OH2-W-4</b>     | 74.85                   |                                   |                          |                                   |
| <b>OH8-W</b>      | <b>OH8-W-1</b>     | 79.99                   | 53141                             | 11327                    | 3386                              |
|                   | <b>OH8-W-2</b>     | 79.43                   |                                   |                          |                                   |
|                   | <b>OH8-W-3</b>     | 79.42                   |                                   |                          |                                   |
| <b>OH9-W</b>      | <b>OH9-W-1</b>     | 79.44                   | 59290                             | 21841                    | 5653                              |
|                   | <b>OH9-W-2</b>     | 78.98                   |                                   |                          |                                   |
|                   | <b>OH9-W-3</b>     | 79.19                   |                                   |                          |                                   |
|                   | <b>OH9-W-4</b>     | 76.91                   |                                   |                          |                                   |
| <b>IA3-W</b>      | <b>IA3-W-1</b>     | 70.94                   | 59043                             | 22891                    | 6495                              |
|                   | <b>IA3-W-2</b>     | 62.87                   |                                   |                          |                                   |
|                   | <b>IA3-W-3</b>     | 68.56                   |                                   |                          |                                   |
|                   | <b>IA3-W-4</b>     | 66.38                   |                                   |                          |                                   |
| <b>IA5-W</b>      | <b>IA5-W-1</b>     | 78.94                   | 27795                             | 6163                     | 1524                              |
|                   | <b>IA5-W-2</b>     | 79.65                   |                                   |                          |                                   |
| <b>IA7-W</b>      | <b>IA7-W-1</b>     | 79.80                   | 32657                             | 7491                     | 2092                              |
|                   | <b>IA7-W-2</b>     | 78.87                   |                                   |                          |                                   |



Table S9. Comparison of overlaps between functional pathways and unique transcripts.

|                                  | Shared unique transcripts of OH weedy populations | Shared unique transcripts of OH wild populations |
|----------------------------------|---------------------------------------------------|--------------------------------------------------|
| Functional categories            | 260                                               | 333                                              |
| Overlapped functional categories | 160                                               | 160                                              |
| Specific functional categories   | 100                                               | 173                                              |
| <b>Overall overlap rate</b>      | <b>54.0%</b>                                      |                                                  |
| Total gene counts                | 2317                                              | 2640                                             |
| Shared gene counts               | 614 (26.5%)                                       | 500 (18.9%)                                      |
| Specific gene count              | 1703 (73.5%)                                      | 2140 (81.1%)                                     |
| <b>Overall overlap rate</b>      | <b>22.5%</b>                                      |                                                  |

Table S10. Herbicide resistance mutation genotypes of ALS gene in giant ragweed population.

| POS <sup>1</sup>           | 304        | 349        | 765         | 766         | 765+766     | 1897        |         |
|----------------------------|------------|------------|-------------|-------------|-------------|-------------|---------|
| REF <sup>2</sup>           | G          | C          | C           | C           | CC          | G           |         |
| ALT <sup>3</sup>           | T          | T          | T           | T           | TT          | T           |         |
| Substitutions <sup>4</sup> | Arg-26-Leu | Ser-41-Phe | Pro-197-Ser | Pro-197-Leu | Pro-197-Phe | Trp-574-Leu |         |
| Samples                    | Genotype   | Genotype   | Genotype    | Genotype    | Genotype    | Genotype    | Habitat |
| OH1-A-1                    |            |            | TT          |             |             |             | Weedy   |
| OH1-A-3                    | GT         |            |             |             |             | GT          | Weedy   |
| OH4-A-1                    | GT         |            |             |             |             |             | Weedy   |
| OH4-A-4                    |            | CT         |             |             |             |             | Weedy   |
| OH7-A-1                    |            | CT         |             |             |             |             | Weedy   |
| OH7-A-4                    |            |            |             |             |             | GT          | Weedy   |
| OH10-A-1                   | GT         |            |             |             |             |             | Weedy   |
| IA1-A-1                    |            |            |             |             | CT/CT       |             | Weedy   |
| IA1-A-3                    |            |            | CT          |             |             |             | Weedy   |
| IA1-A-4                    |            |            |             |             | CT/CT       |             | Weedy   |
| IA6-A-1                    |            | CT         |             |             |             |             | Weedy   |
| IA6-A-2                    |            | CT         | CT          |             |             |             | Weedy   |
| OH2-W-1                    | TT         |            |             |             | TT/TT       |             | Wild    |
| OH2-W-2                    | GT         |            |             |             | CT/CT       |             | Wild    |
| OH2-W-3                    | TT         |            |             |             | TT/TT       |             | Wild    |
| OH2-W-4                    |            |            |             |             |             | GT          | Wild    |
| OH3-W-3                    | GT         |            |             |             |             | GT          | Wild    |
| OH3-W-4                    | GT         |            |             |             |             |             | Wild    |
| OH3-W-5                    |            | CT         |             |             |             |             | Wild    |
| OH6-W-1                    | GT         |            |             |             |             | GT          | Wild    |
| OH6-W-2                    |            |            |             | CT          |             |             | Wild    |
| OH6-W-3                    | GT         |            |             |             |             |             | Wild    |
| IA5-W-1                    |            | CT         |             |             |             |             | Wild    |
| IA7-W-1                    |            |            | CT          |             |             |             | Wild    |
| MN2-W-5                    |            | CT         |             |             |             |             | Wild    |

Note: for each sample, which have AA substitution, the mutation genotypes are listed. Reference homozygous genotypes are omitted. Green background highlights these mutations conferring resistance are experimentally confirmed in previous studies. 1. SNP position across ALS gene sequence. 2. Reference genotype. 3. Alternative genotype. 4. Amino acid alteration due to this SNP mutation.

Supplemental Table S11. Significant different genotype frequency between weedy and wild samples. Fisher's exact test is used to test if genotypes on each polymorphic site are significant different between weedy and wild populations.

| Gene    | Position | Ref SNP | Alt SNP | Ref homozygous genotype | Heterozygous genotype | Alt homozygous genotype | Unknown genotype | Weedy Ref Allele | Weedy Alt Allele | Wild Ref Allele | Wild Alt Allele | Fisher's exact test p-value | * 0.05<br>** 0.01<br>*** 0.001 |
|---------|----------|---------|---------|-------------------------|-----------------------|-------------------------|------------------|------------------|------------------|-----------------|-----------------|-----------------------------|--------------------------------|
| ACCase  | 155      | T       | C       | 59                      | 6                     | 2                       | 0                | 53               | 1                | 71              | 9               | 0.049                       | *                              |
|         | 2353     | A       | G       | 47                      | 3                     | 3                       | 14               | 38               | 0                | 59              | 9               | 0.025                       | *                              |
|         | 3205     | G       | A       | 53                      | 2                     | 3                       | 9                | 40               | 8                | 68              | 0               | 0.001                       | ***                            |
|         | 3229     | G       | T       | 41                      | 8                     | 8                       | 10               | 33               | 17               | 57              | 7               | 0.005                       | **                             |
|         | 3460     | G       | A       | 53                      | 6                     | 2                       | 6                | 40               | 8                | 72              | 2               | 0.014                       | *                              |
|         | 3481     | A       | G       | 57                      | 3                     | 1                       | 6                | 41               | 5                | 76              | 0               | 0.007                       | **                             |
|         | 3685     | A       | G       | 41                      | 5                     | 4                       | 17               | 42               | 2                | 45              | 11              | 0.035                       | *                              |
|         | 4592     | C       | A       | 55                      | 6                     | 2                       | 4                | 41               | 7                | 75              | 3               | 0.042                       | *                              |
| ALS     | 204      | A       | G       | 46                      | 5                     | 0                       | 16               | 37               | 5                | 60              | 0               | 0.010                       | *                              |
|         | 401      | C       | A       | 57                      | 10                    | 0                       | 0                | 53               | 1                | 71              | 9               | 0.049                       | *                              |
|         | 557      | T       | C       | 15                      | 23                    | 29                      | 0                | 15               | 39               | 38              | 42              | 0.030                       | *                              |
|         | 572      | T       | C       | 9                       | 26                    | 32                      | 0                | 24               | 30               | 20              | 60              | 0.024                       | *                              |
|         | 587      | A       | G       | 61                      | 6                     | 0                       | 0                | 49               | 5                | 79              | 1               | 0.039                       | *                              |
|         | 1064     | T       | A       | 62                      | 4                     | 1                       | 0                | 49               | 5                | 79              | 1               | 0.039                       | *                              |
|         | 1532     | G       | A       | 59                      | 7                     | 1                       | 0                | 54               | 0                | 71              | 9               | 0.011                       | *                              |
|         | 1591     | A       | G       | 60                      | 7                     | 0                       | 0                | 48               | 6                | 79              | 1               | 0.017                       | *                              |
|         | 1973     | C       | T       | 44                      | 19                    | 4                       | 0                | 37               | 17               | 70              | 10              | 0.009                       | **                             |
| EPSPS_1 | 318      | A       | G       | 51                      | 15                    | 1                       | 0                | 43               | 11               | 74              | 6               | 0.036                       | *                              |
|         | 756      | G       | A       | 53                      | 11                    | 2                       | 1                | 50               | 2                | 67              | 13              | 0.046                       | *                              |
| EPSPS_2 | 1090     | A       | G       | 56                      | 11                    | 0                       | 0                | 53               | 1                | 70              | 10              | 0.050                       | *                              |

|             |      |   |   |    |    |    |    |    |    |    |    |       |    |
|-------------|------|---|---|----|----|----|----|----|----|----|----|-------|----|
|             | 1150 | C | T | 55 | 10 | 2  | 0  | 43 | 11 | 77 | 3  | 0.003 | ** |
|             | 1201 | T | C | 6  | 23 | 38 | 0  | 9  | 45 | 26 | 54 | 0.047 | *  |
|             | 1819 | A | G | 50 | 2  | 2  | 13 | 40 | 6  | 62 | 0  | 0.005 | ** |
| <b>GS</b>   |      |   |   |    |    |    |    |    |    |    |    |       |    |
|             | 4169 | A | G | 57 | 9  | 1  | 0  | 53 | 1  | 70 | 10 | 0.050 | *  |
| <b>HPPD</b> |      |   |   |    |    |    |    |    |    |    |    |       |    |
|             | 534  | C | T | 38 | 6  | 3  | 20 | 35 | 1  | 47 | 11 | 0.026 | *  |
| <b>PDS</b>  |      |   |   |    |    |    |    |    |    |    |    |       |    |
|             | 2300 | C | T | 45 | 9  | 3  | 10 | 46 | 2  | 53 | 13 | 0.023 | *  |
|             | 2492 | C | A | 1  | 23 | 43 | 0  | 16 | 38 | 9  | 71 | 0.012 | *  |
|             | 2926 | G | A | 55 | 12 | 0  | 0  | 54 | 0  | 68 | 12 | 0.002 | ** |
| <b>PPO</b>  |      |   |   |    |    |    |    |    |    |    |    |       |    |
|             | 155  | C | T | 61 | 5  | 1  | 0  | 48 | 6  | 79 | 1  | 0.017 | *  |
|             | 298  | C | T | 38 | 23 | 6  | 0  | 45 | 9  | 54 | 26 | 0.047 | *  |
|             | 805  | T | C | 58 | 9  | 0  | 0  | 46 | 8  | 79 | 1  | 0.003 | ** |
|             | 1405 | T | G | 48 | 14 | 5  | 0  | 37 | 17 | 73 | 7  | 0.001 | ** |

**Note:**

**Position:** SNP position on transcripts

**Ref SNP:** nucleotide on reference transcripts

**Alt SNP:** nucleotide on sample reads

**Ref homozygous genotype:** sample count with homozygous reference genotype (0/0)

**Heterozygous genotype:** sample count with heterozygous genotype (0/1)

**Alt homozygous genotype:** sample count with homozygous alternative genotype (1/1)

**Unknown genotype:** missing data

**Weedy Ref Allele:** sample count in weedy population with reference alleles (0)

**Weedy Alt Allele:** sample count in weedy population with alternative alleles (1)

**Wild Ref Allele:** sample count in wild population with reference alleles (0)

**Wild Alt Allele:** sample count in wild population with alternative alleles (1)
